# Supplementary material for: Optogenetic Control Reveals Differential Promoter Interpretation of Transcription Factor Nuclear Translocation Dynamics
Source: PubMed Central journal article supplement — Cell Syst. Author manuscript; Available in PMC 2020 Nov 7. (PMC7648432; doi:10.1016/j.cels.2020.08.009), 2020-09-07
Supplement: NIHMS1628624-supplement-2.pdf [file NIHMS1628624-supplement-2.pdf]

Figure S1

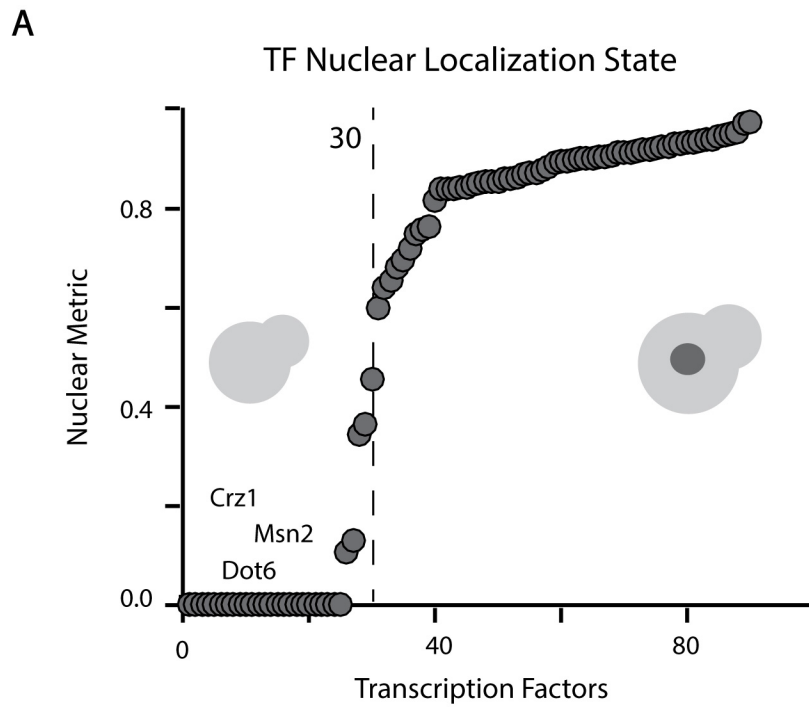

**B**

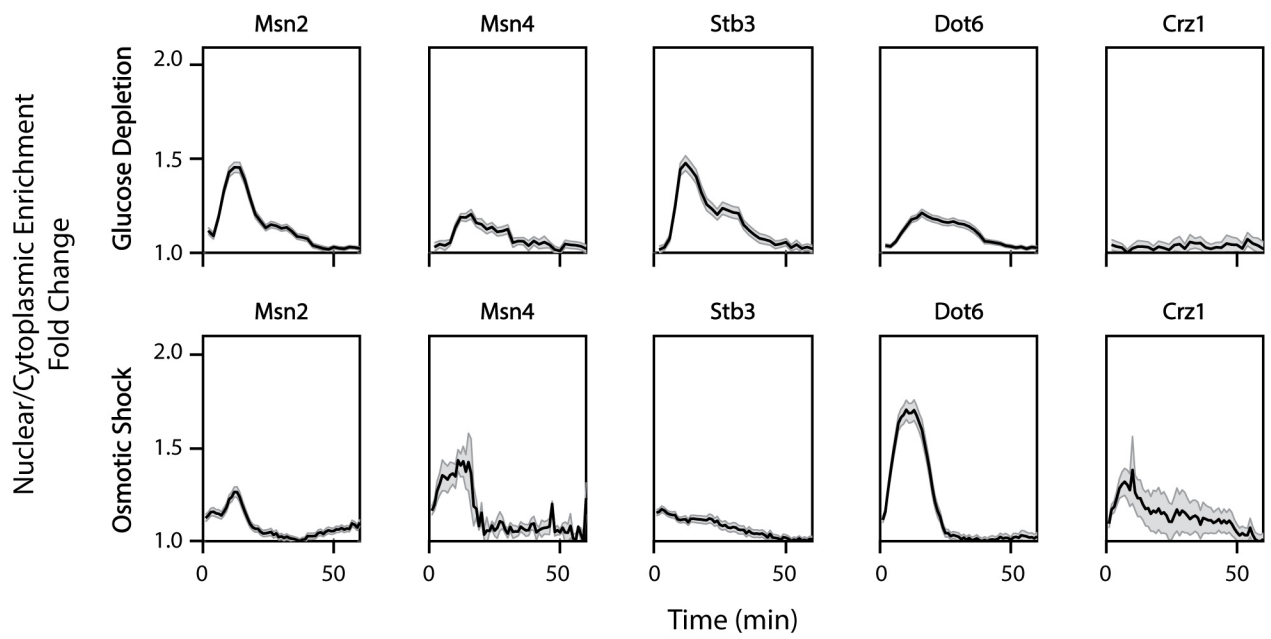

Figure S2

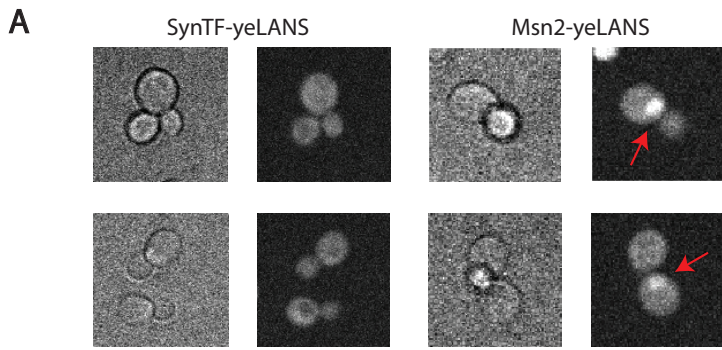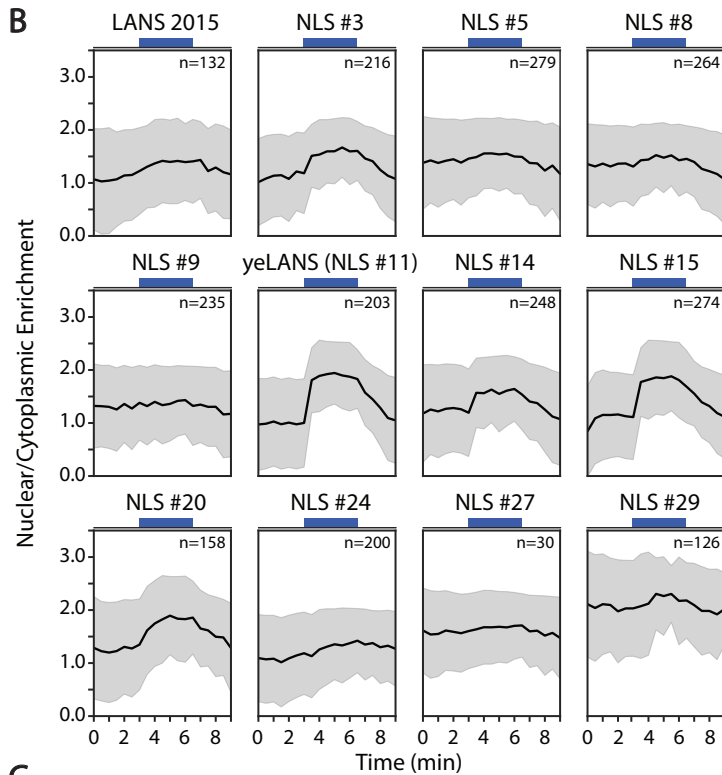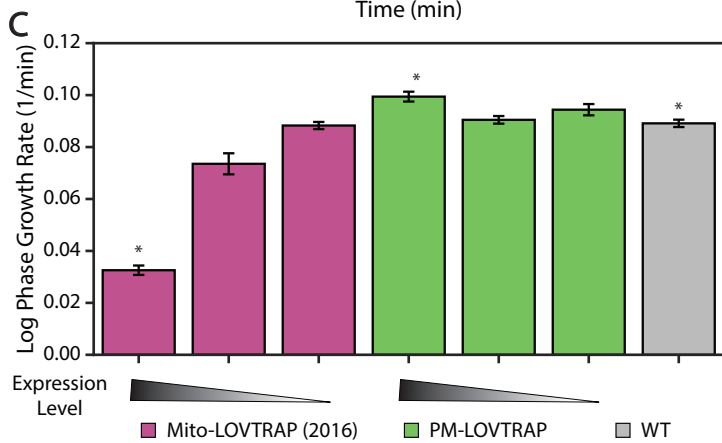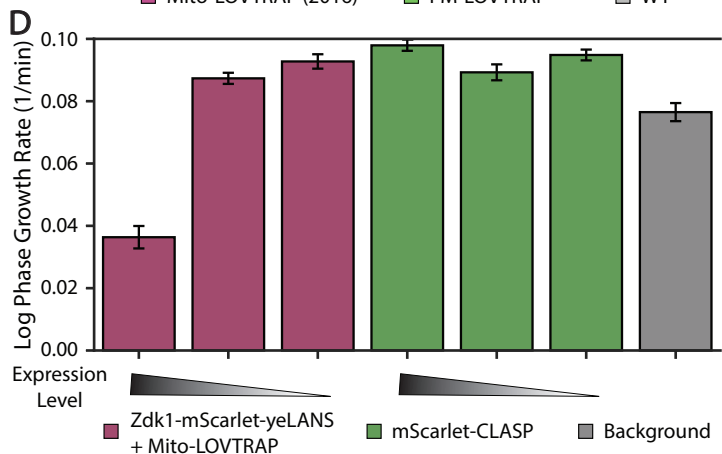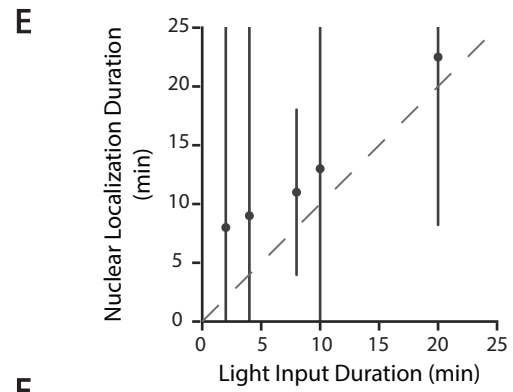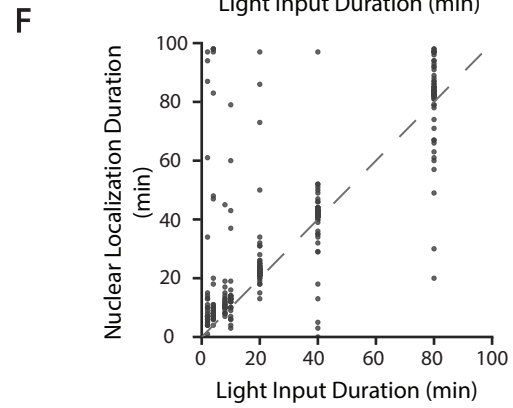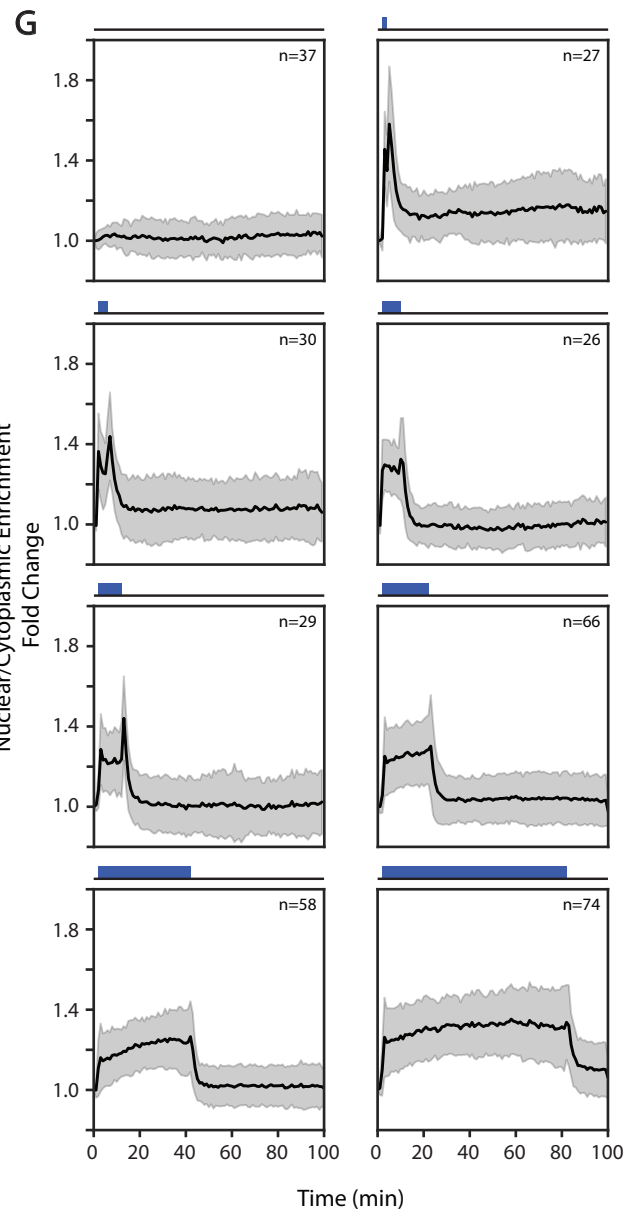

Figure S3

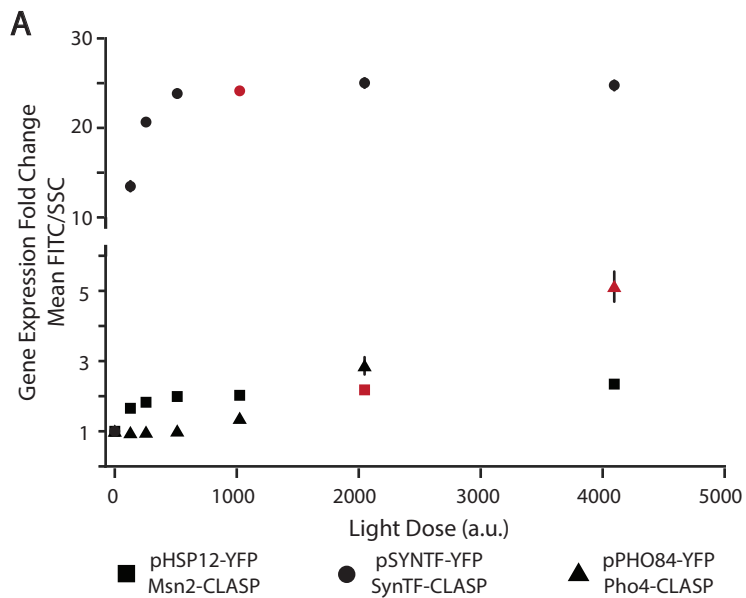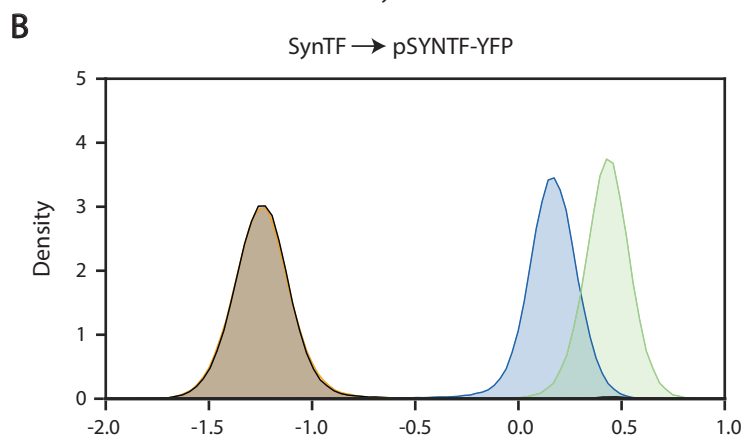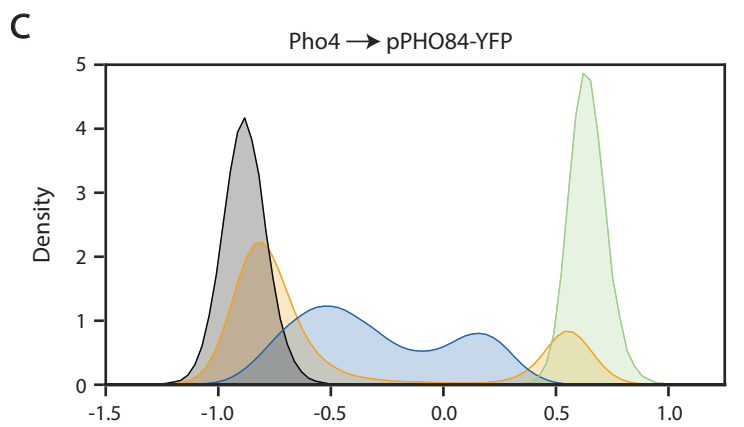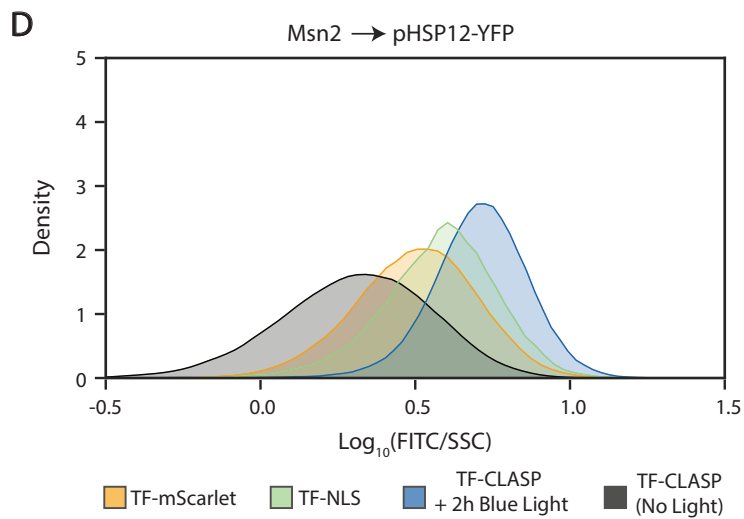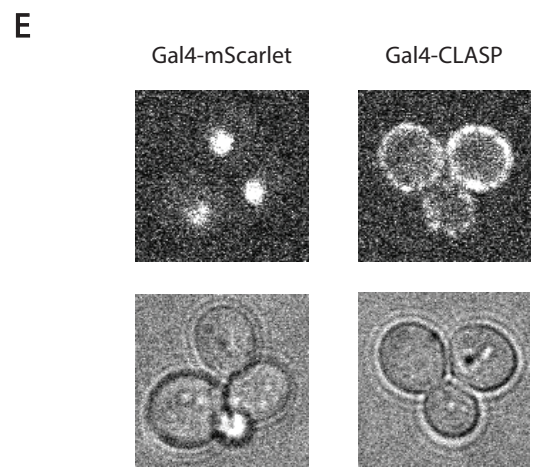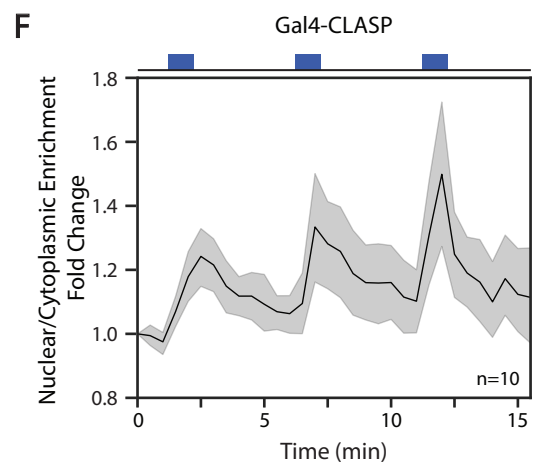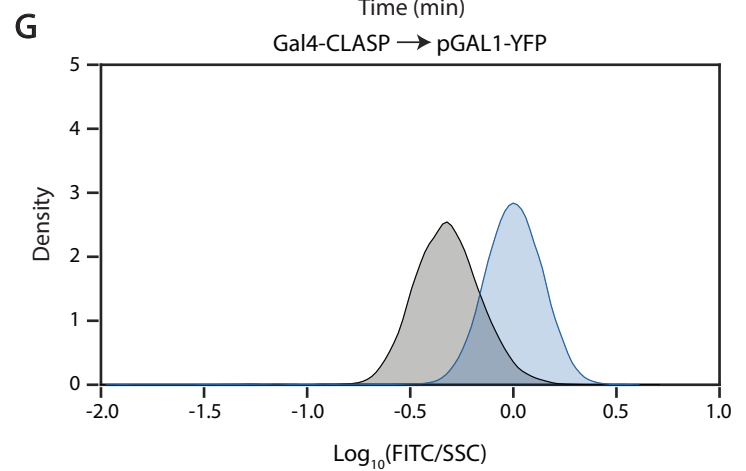

Figure S4

**A**

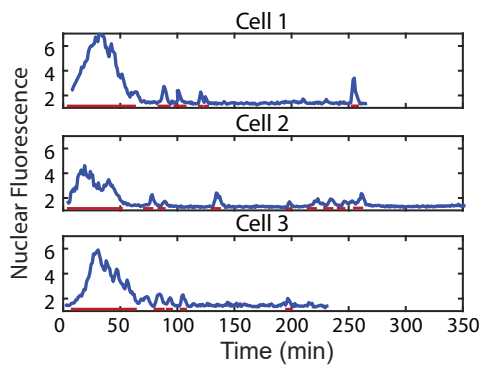

**B**

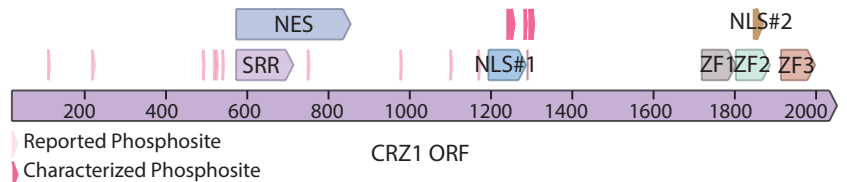

**C**

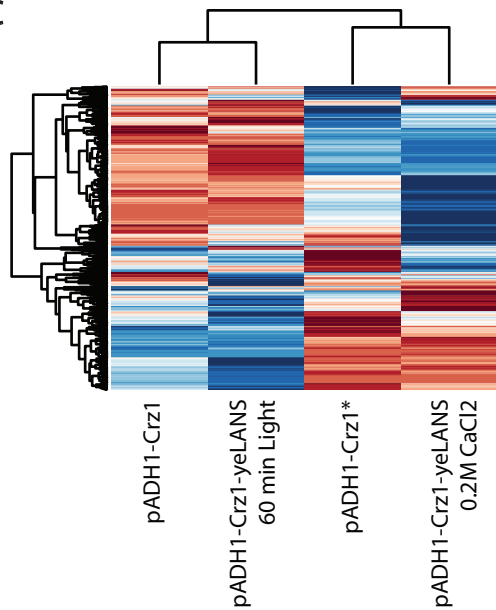

**D**

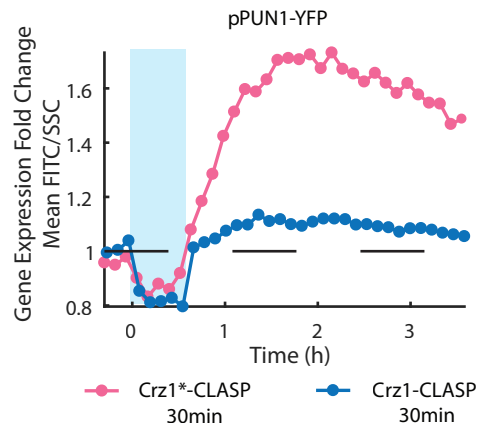

**E**

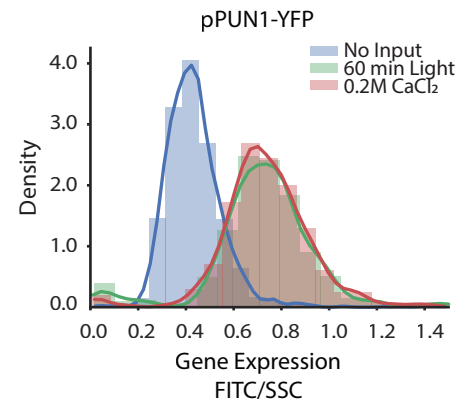

**F**

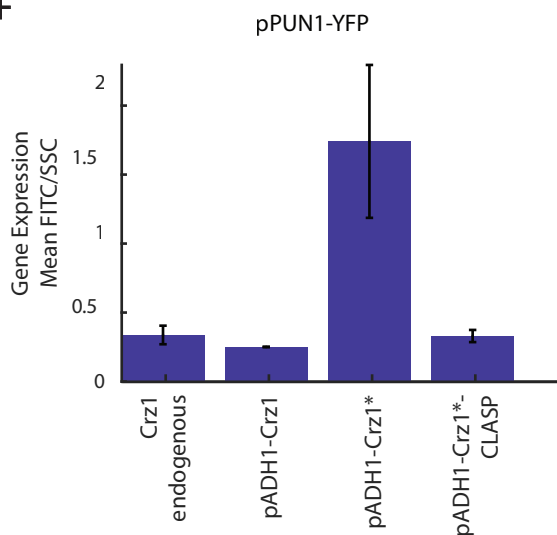

**G**

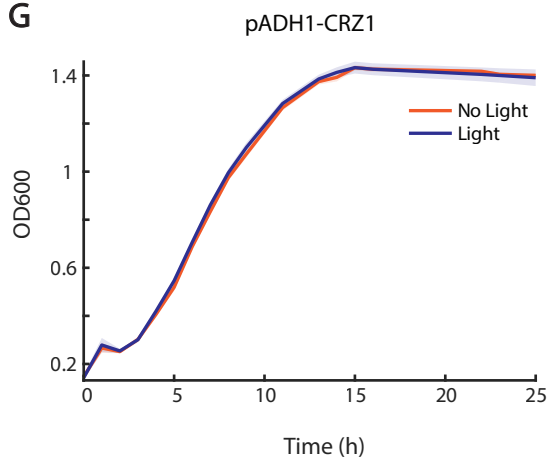

**H**

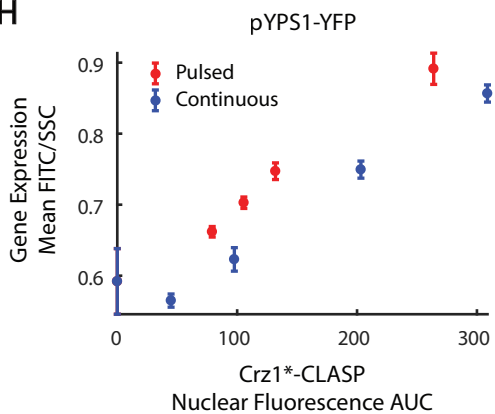

**I**

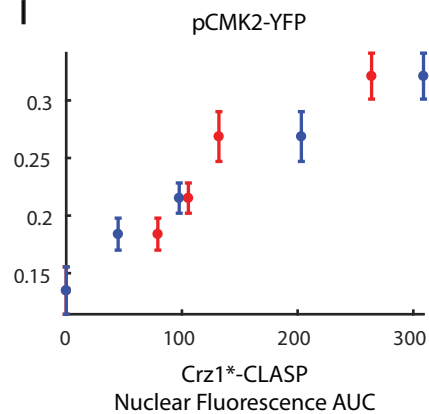

**J**

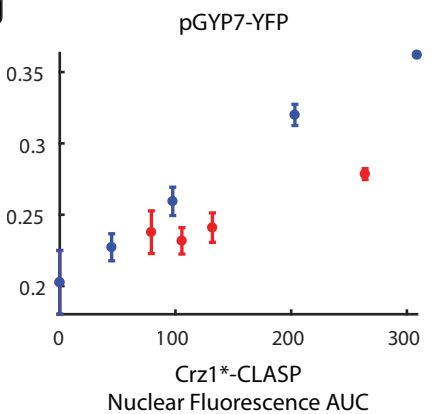

Figure S5

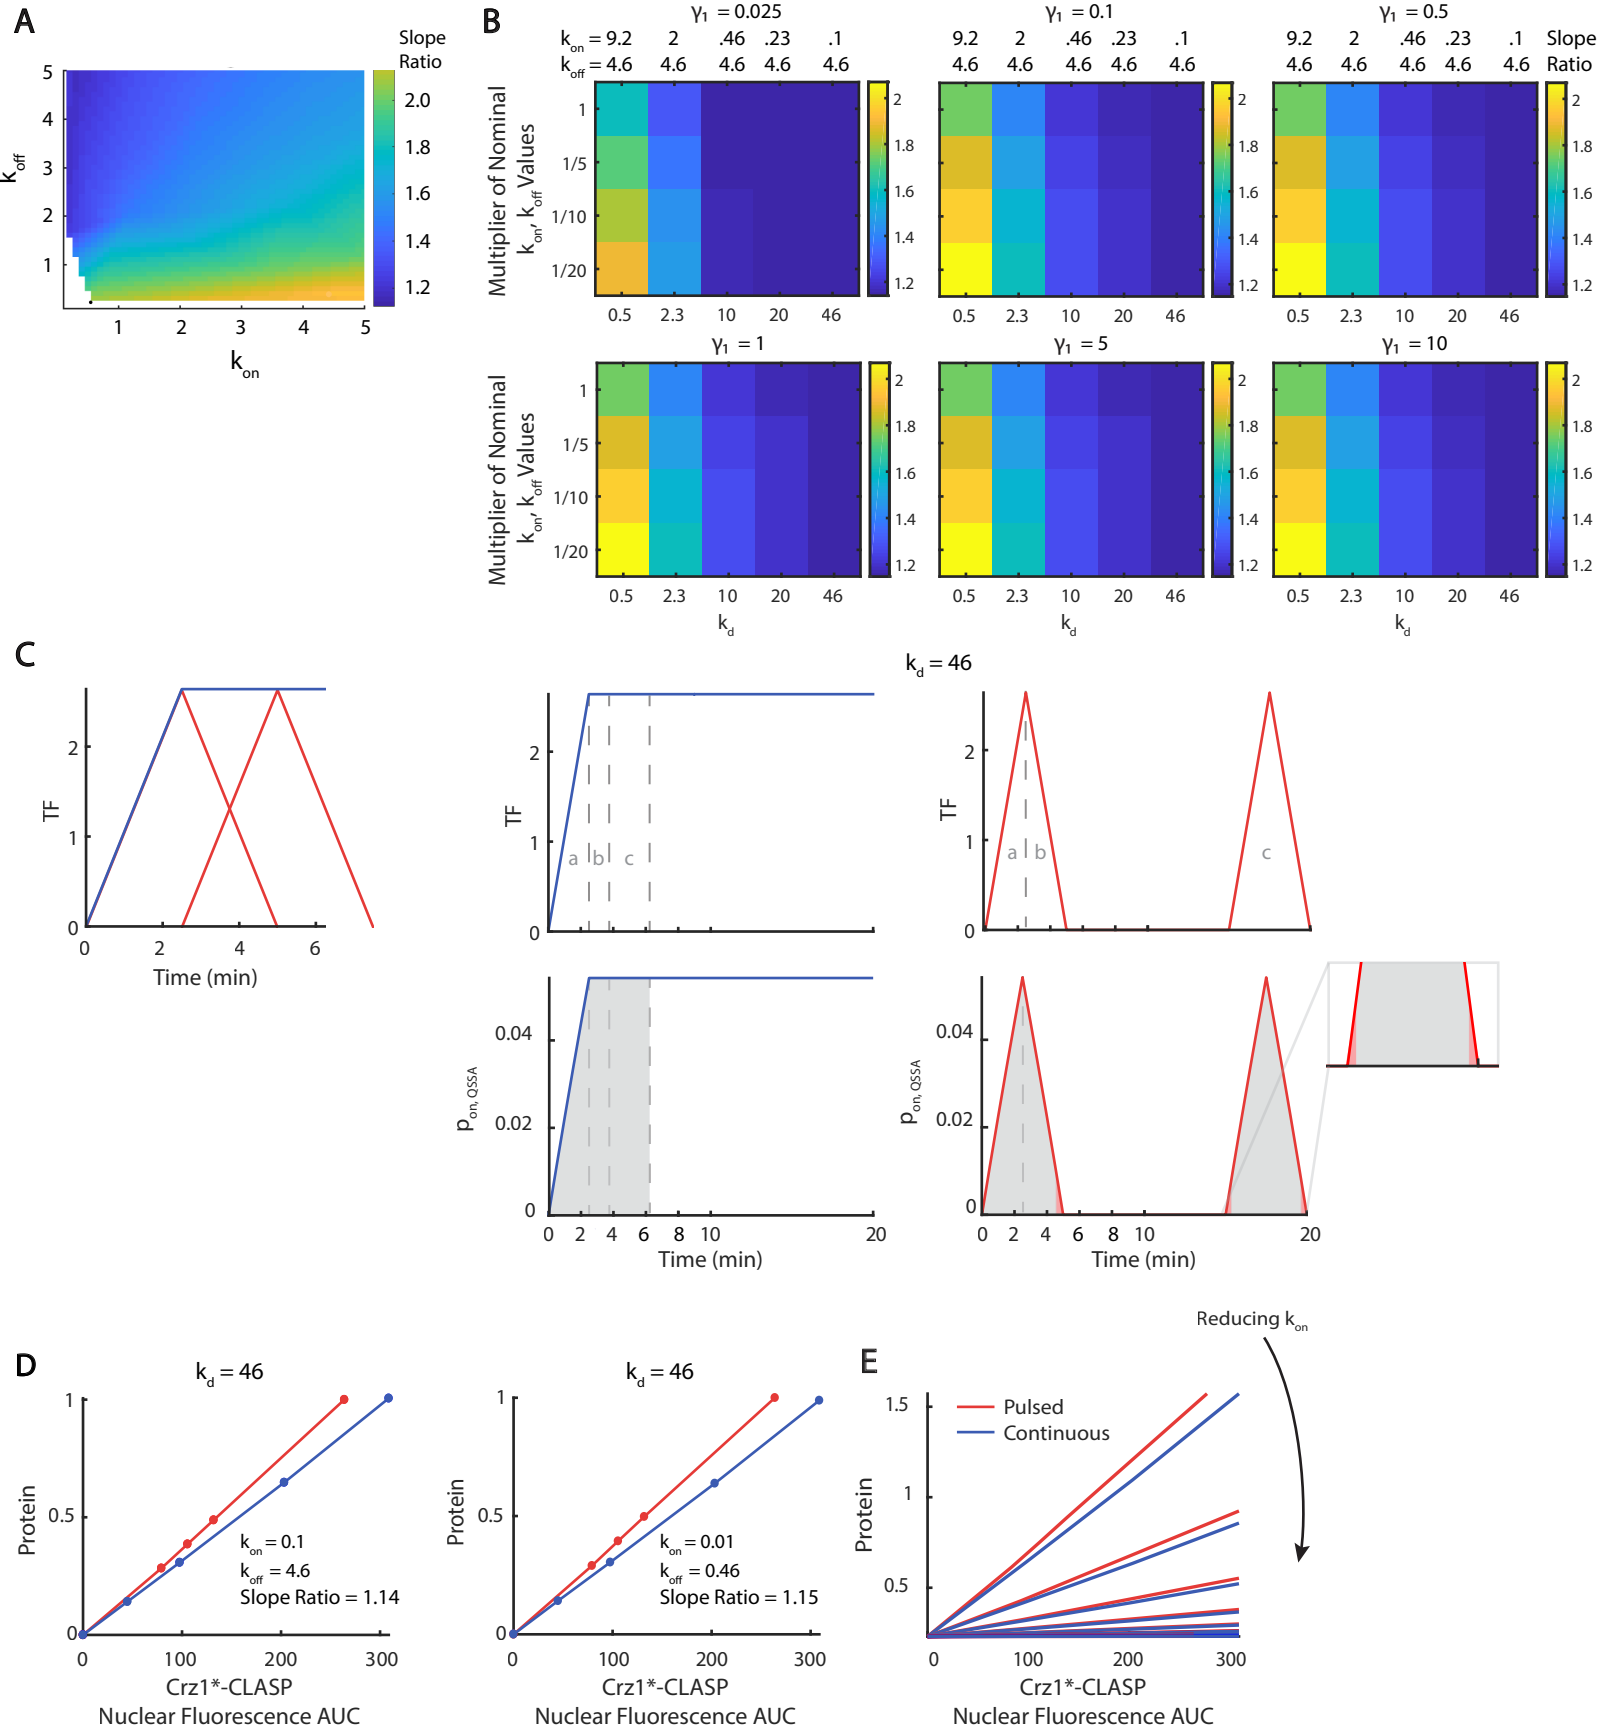

Figure S6

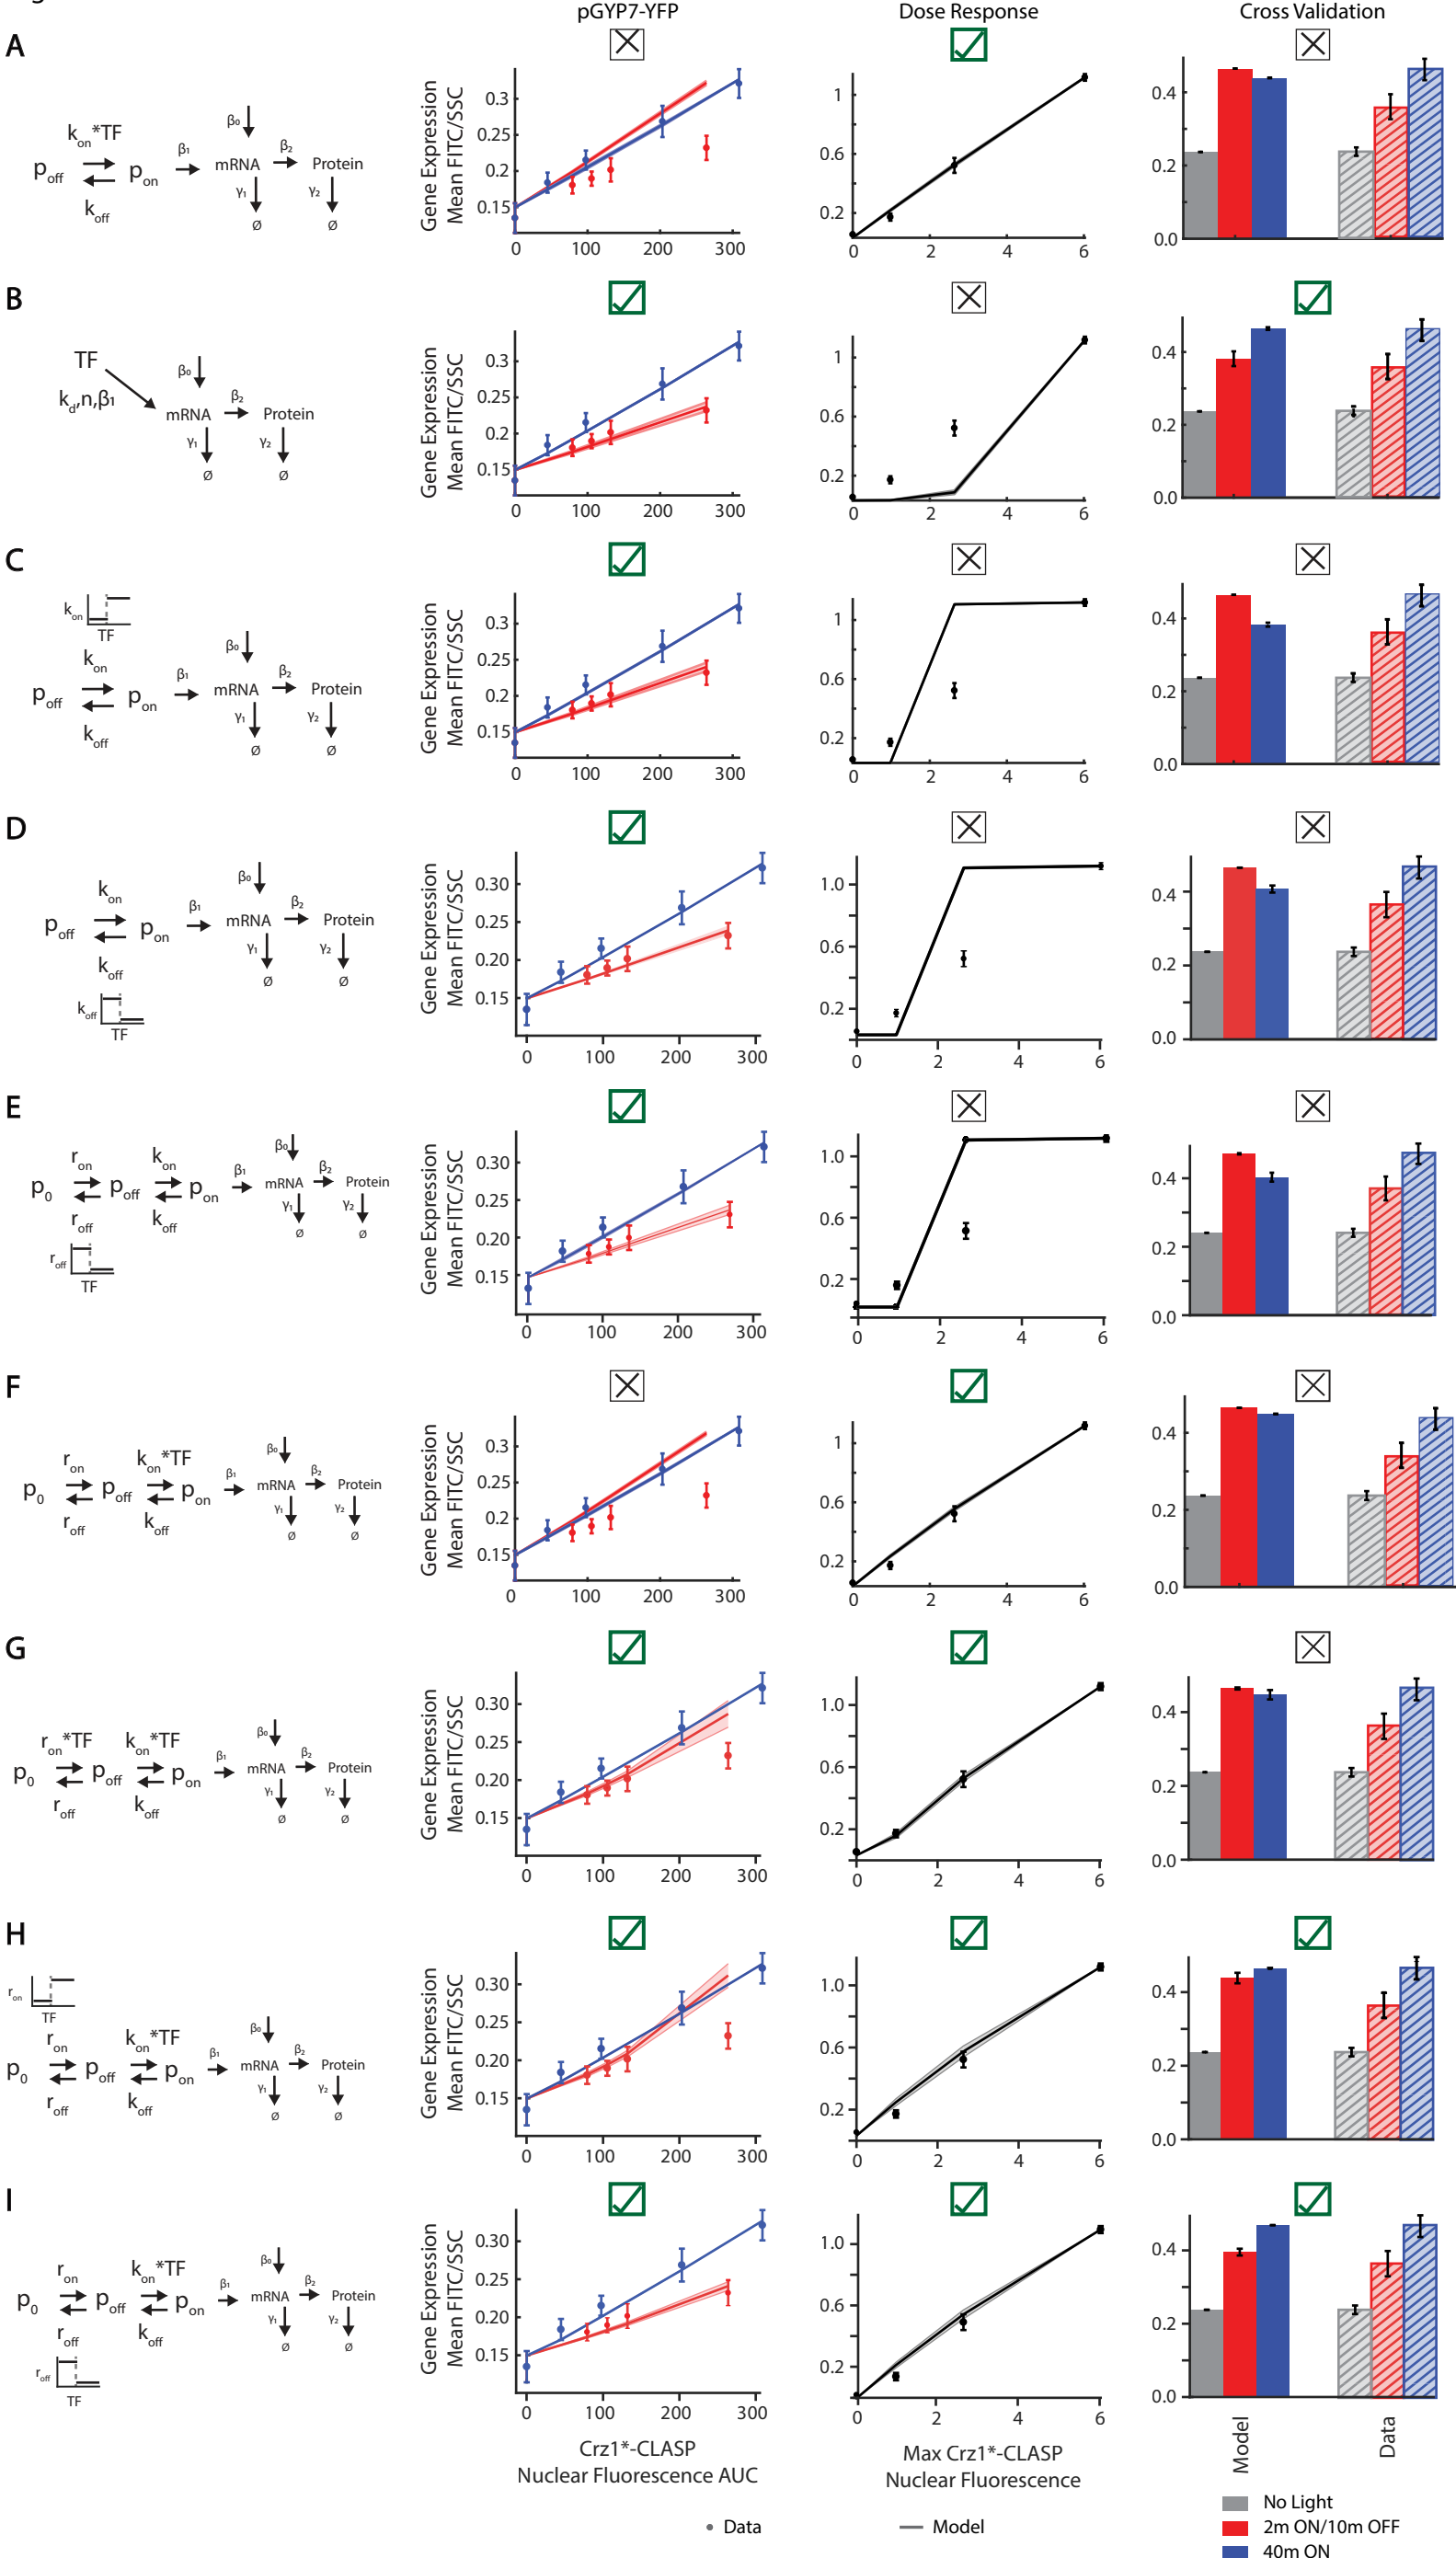

Figure S7

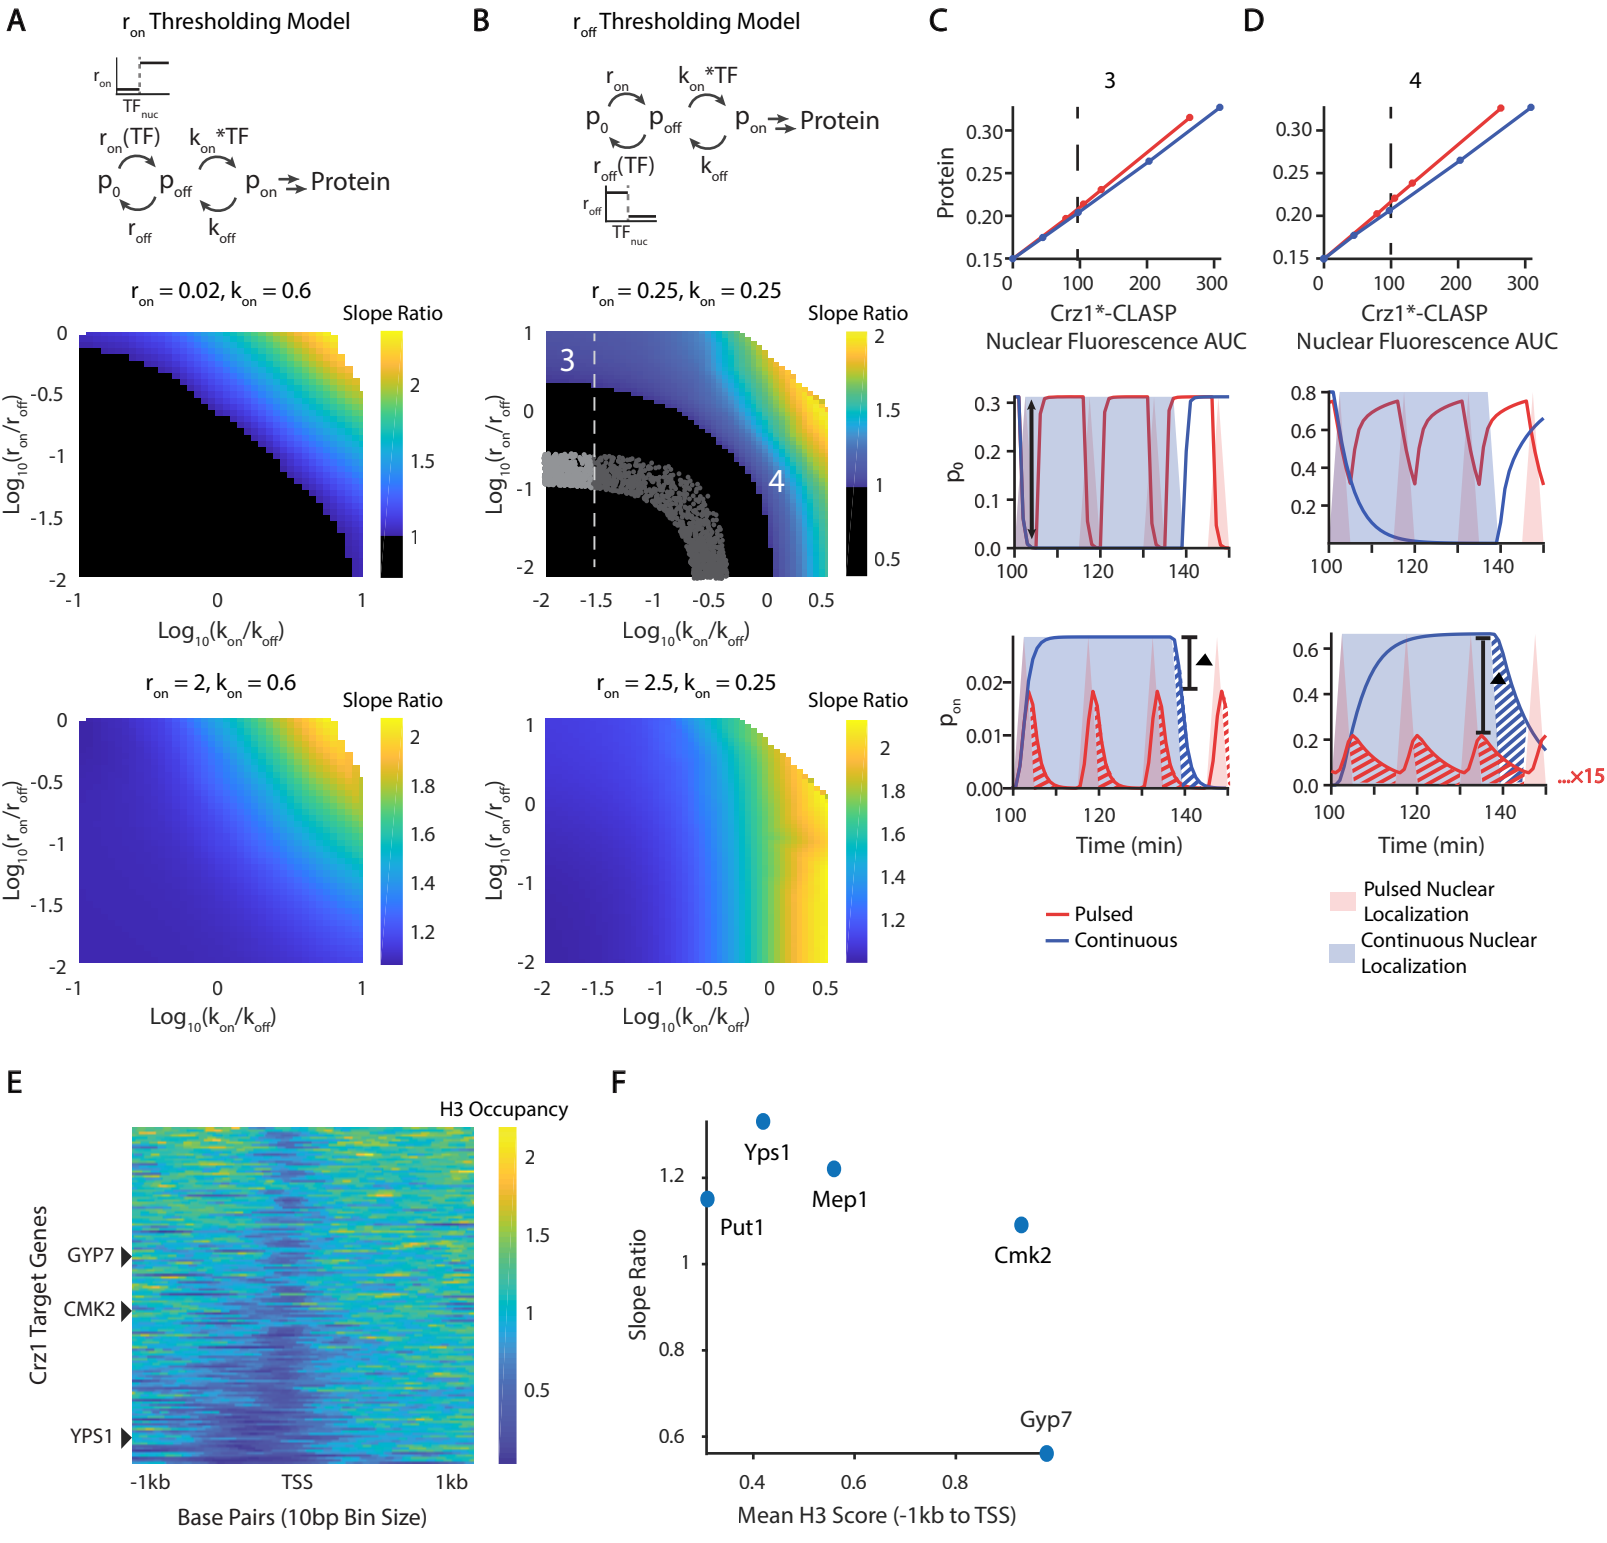

Figure S8

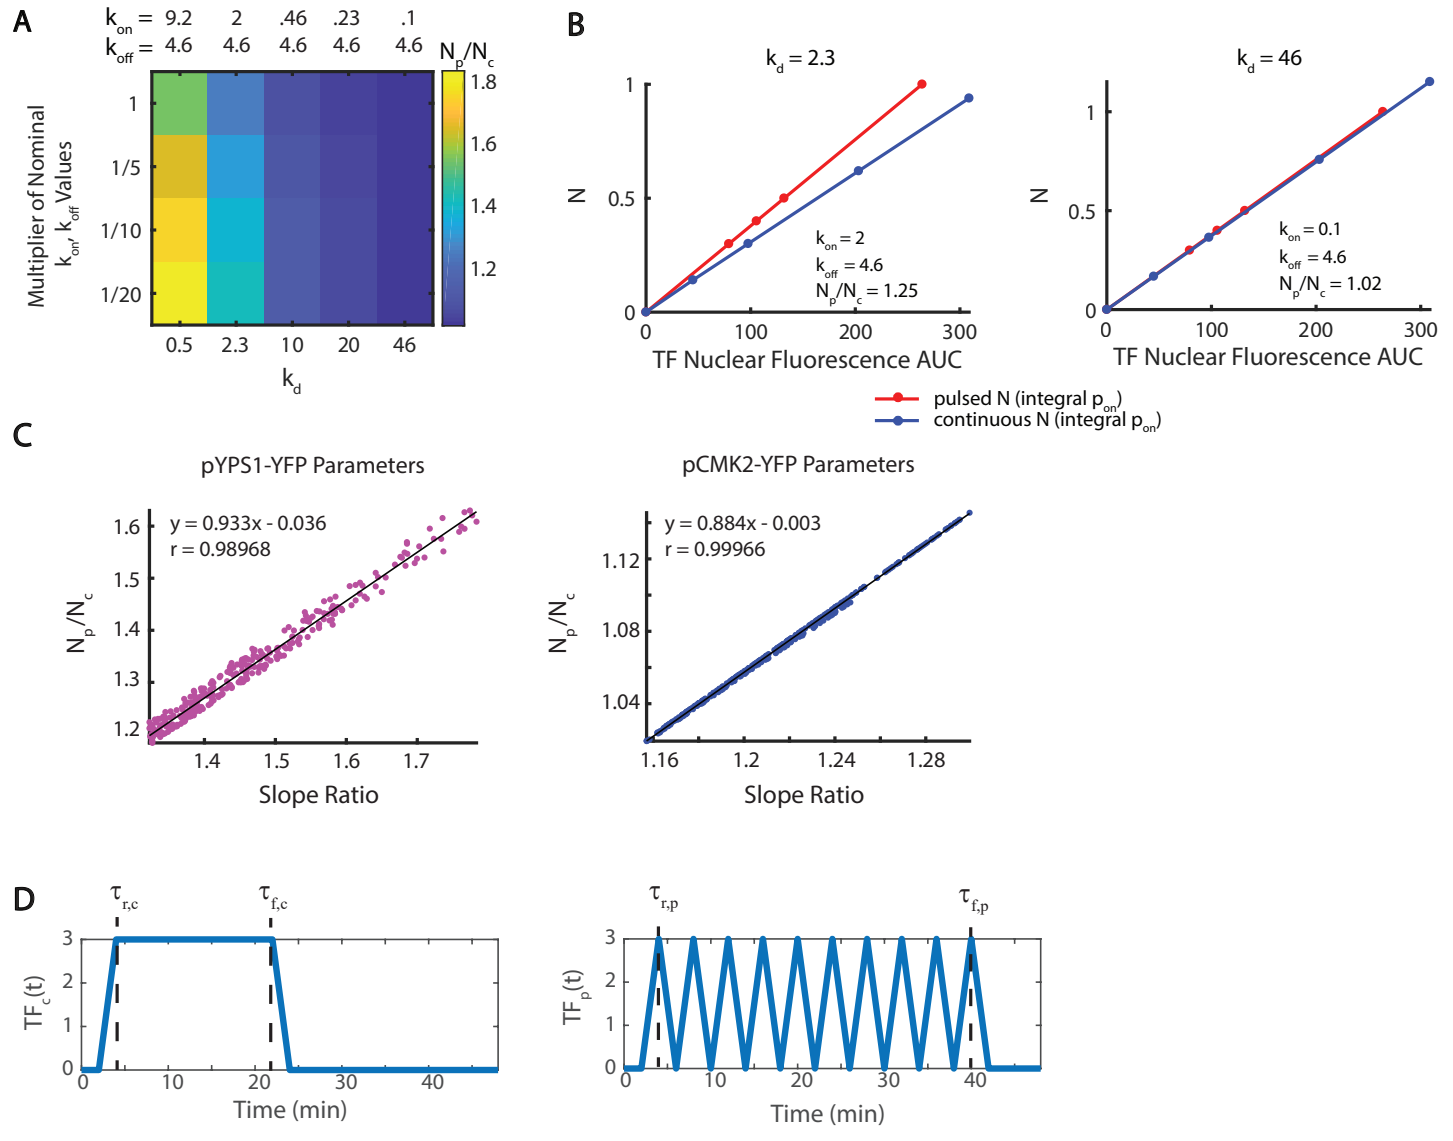



Figure S9

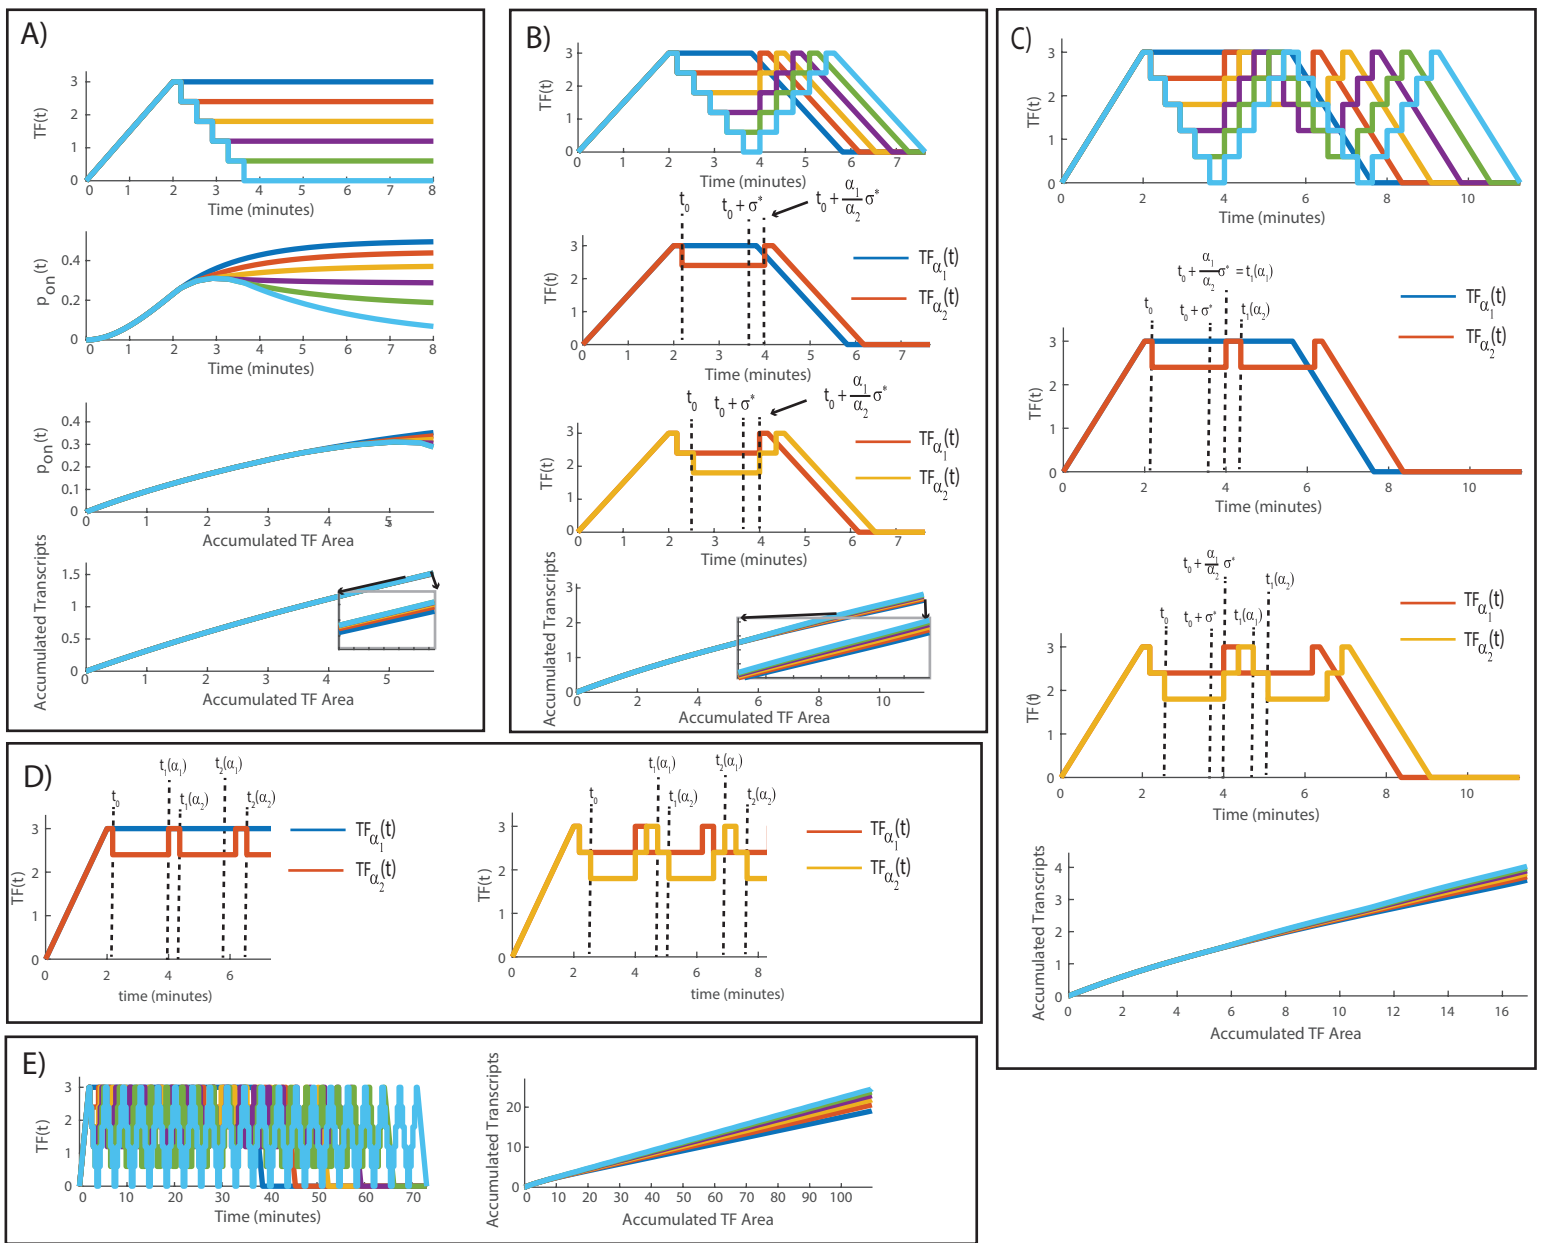

## Supplementary Figure Captions

**Figure S1: Approximately one-third of TFs are basally cytoplasmic in log phase and a subset are shown to exhibit transient nuclear localization, related to Figure 1. A)** LOC scores of available transcription factors from the CYCLOPs database are plotted (Chong et al 2015). The LOC score, as defined in Chong et al., 2015, is the number of cells assigned to a specific location (nucleus in this instance) over the total number of cells in any subcellular location. Increasing LOC score denotes increasing nuclear enrichment. **B)** Fold change of nuclear enrichment for a panel of stress-responsive transcription factors (Msn2, Msn4, Stb3, Dot6, and Crz1) are plotted as a function of time in response to environmental inputs (Glucose depletion and osmotic shock). For glucose depletion, SDC media (2% glucose) is replaced with SD media with 0.05% glucose. For osmotic shock, SDC media is replaced with SDC media with 0.95M sorbitol. Imaging begins at  $t = 0$  after addition of environmental perturbation and samples are imaged every 30 seconds. The solid black lines represent the mean of single cell traces and the shading represents the standard error of the mean.

**Figure S2: Optimization of LANS and LOVTRAP and CLASP characterization, related to Figure 1. A)** Confocal microscopy images of yeast expressing SynTF-yeLANS and Msn2-yeLANS in the absence of blue light. Red arrows (inset) denote examples of cells that exhibit nuclear/cytoplasmic localization of Msn2-yeLANS. **B)** Mean nuclear/cytoplasmic enrichment (nuclear intensity divided by cytoplasm intensity) is plotted as a function of time. Shaded error represents standard deviation and light input regimes are illustrated above graphs.  $n$  refers to number of cells tracked and subplot headings (e.g., NLS #3) correspond to NLS peptides listed in Table S1. **C)** Comparison of Mito-LOVTRAP and PM-LOVTRAP strains. Mito-LOVTRAP and PM-LOVTRAP are expressed from pTDH3 (highest), pRPL18B (medium), and pREV1 (lowest) promoters. Strains marked with an asterisk denote those for which growth curves are plotted in Figure 1B of main text. Error bars represent standard error of the linear regression for data from 3 growth experiments. **D)** Comparison of Zdk1-mScarlet-yeLANS + Mito-LOVTRAP and CLASP. Both components (e.g. Mito-LOVTRAP and Zdk1-mScarlet-yeLANS) are expressed at the same level, using either pTDH3, pRPL18B, or pREV1 promoters. Background (control strain) denotes the WT strain with pSYNTF-YFP integrated in the LEU locus. Zdk1-mScarlet-yeLANS + Mito-LOVTRAP and mScarlet-CLASP

strains also have this integration. Error bars represent standard error of the linear regression for data from 3 growth experiments. **E)** A zoom-in of Figure 1D in the main text that shows median duration of nuclear localization as a function of light input duration; the line  $X = Y$  is denoted by the dashed line. The zoomed graph illustrates that for short pulse durations, the OFF time -- time that nuclear localization extends past the pulse -- is not linearly related to light input duration. **F)** A scatterplot that shows duration of nuclear localization as a function of light input duration. Each point represents a single cell. **G)** Mean nuclear/cytoplasmic enrichment fold change as a function of time for mScarlet-CLASP induced with blue light. Light input regimes are illustrated above graphs (indicating 0, 2, 4, 8, 10, 20, 40, or 80 minute light input). In all plots, except where noted, error (bars or shading) represents standard deviation.

**Figure S3: Characterization of TF-CLASP strains, related to Figure 2.** **A)** Mean FITC/SSC is plotted as a function of light intensity (a.u.) for strains that are exposed to different amplitudes of light for two hours (continuous input). Marked in red is the lowest light dose which yielded near-maximal expression for each strain (>90%); this dose is used in all microscopy and flow cytometry experiments for each strain. Error bars represent standard error of the mean for 9 biological replicates. Light doses are quantified in mW in Table S4. **B-D)** Each subplot shows the probability density functions of  $\log_{10}(\text{FITC}/\text{SSC})$  of gene expression of corresponding fluorescent promoter fusion for TF-CLASP, TF-NLS (constitutive nuclear localization), and TF-mScarlet (basal localization) strains. Distributions display expression from 9 biological replicates (data from replicates are pooled). TF-mScarlet strains are not exposed to light, for facile comparison to TF-CLASP (No Light) expression. TF-NLS strains are exposed to two hours of blue light (continuous input) to control for the effect of blue light on YFP fluorescence when comparing to TF-CLASP (Light) expression. For all panels, TF cargos are expressed from pRPL18B. **E)** RFP (**top panels**) and brightfield (**bottom panels**) images of mScarlet-tagged Gal4 (**left panels**) and mScarlet-tagged Gal4-CLASP (**right panels**). **F)** Gal4 nuclear/cytoplasmic enrichment is plotted as a function of time. Light input regime is illustrated above graph. Shaded gray area represents 95% confidence interval.  $n$  refers to the number of cells tracked. **G)** Gene expression of pGal1-YFP resulting from Gal4-CLASP nuclear localization following two hours of blue light input at 25% of the maximal Optoplate intensity. Distributions display expression from 3 biological replicates (data from replicates is pooled). Shown is the probability density function of  $\log_{10}(\text{FITC}/\text{SSC})$  of pGAL1-YFP in the dark (gray) or after light exposure (blue).

**Figure S4: Characterization of Crz1, Crz1-CLASP, and Crz1\*-CLASP nuclear translocation and gene expression with CaCl<sub>2</sub> or blue light input, related to Figure 3.** **A)** Single cell traces of Crz1 nuclear fluorescence over time for 3 representative cells following 0.2M CaCl<sub>2</sub>. The red lines indicate nuclear localization events. **B)** Schematic of the CRZ1 Open Reading Frame (ORF). Labeled are the Nuclear Localization Sequences (NLS#1 and NLS#2) and the Nuclear Exit Sequence (NES), as well as the Serine-Rich Region (SRR), which is calcium responsive. The light pink triangles denote reported S/T phosphosites, while the dark pink triangles denote reported and characterized S/T phosphosites. The 19 dark and light pink phosphosites are mutated from S/T -> A to construct Crz1\*. Phosphosites were identified using PhosphoGRID. **C)** Heatmap of clustered gene expression for 5657 genes. Samples in each column of the heatmap are pADH1-Crz1 with no input, pADH1-Crz1-yeLANS with 60 minutes of light, pADH1-Crz1\* with no input, and pADH1-Crz1-yeLANS with 0.2M CaCl<sub>2</sub> delivered at the start of the experiment. All samples are in log phase and all measurements are taken 60 minutes after delivery of input. **D)** Gene expression (mean FITC/SSC) of the Crz1 reporter gene pPUN1-YFP driven by either Crz1-CLASP (blue) or Crz1\*-CLASP (pink) when given 30 minutes of blue light. Data plotted is for 1 biological replicate. **E)** Probability density functions of gene expression of pPUN1-YFP, measured by FITC/SSC, in response to 0.2M CaCl<sub>2</sub> (which causes an initial Crz1 nuclear localization pulse of 40-60 minutes) in a pADH1-Crz1 strain, 60 minutes of blue light exposure in Crz1\*-CLASP, and no input in a pADH1-Crz1 strain. Measurements are taken at 4 hours after delivery of input. Data plotted is for 1 biological replicate. **F)** Basal gene expression of pPUN1-YFP for different Crz1 strains: endogenous Crz1, pAdh1-Crz1 in a Crz1 KO background, pAdh1-Crz1\* in a Crz1 KO background, and pAdh1-Crz1\*-CLASP (without light input) in a Crz1 KO background. Error bars show standard deviation of 3 biological replicates. **G)** OD600, a measurement for growth, plotted as a function of time, for pAdh1-Crz1 with (blue) and without (red) light input (intensity 512 a.u.) over a period of 24 hours, indicating that light exposure does not affect population growth. Measurements are taken every hour. Data plotted is for 3 technical replicates. **H)** Characterization of additional Crz1\*-CLASP gene expression in response to blue light, as in Figure 3. Output-Fluorescence plot for pYPS1-YFP. **I)** Output-Fluorescence plot for pCMK2-YFP. **J)** Output-Fluorescence plot for pGYP7-YFP. These data are for 3 biological replicates taken from different days in addition to the data shown in Figure 3. For H-J, error bars are standard deviation of 3 biological replicates.

**Figure S5. Higher gene expression of promoters in response to short pulses occurs when the dose response is saturated at low TF concentration, related to Figure 4. A)**

Heatmap of slope ratio resulting from the model in (Figure 4A) as a function of  $k_{on}$  and  $k_{off}$ , which both vary from 0.1-5. The ratio  $k_{off}/k_{on}$  decreases in a counterclockwise direction on the heatmap.  $\beta_1$  varies from 0.0001-10,  $\beta_0$  from 0.000001-0.01 and  $\beta_2$  from 0.0001-10. The parameter  $\gamma_1$  is set to 0.06 and  $\gamma_2$  to 0.0083. **B)** Heatmap of slope ratio for increasing  $k_d$  and different values of  $k_{on}$  and  $k_{off}$ . Each column has a given value of  $k_d$  and each row has different values for  $k_{on}$  and  $k_{off}$  that produce the same  $k_d$ . The nominal  $k_{on}$  and  $k_{off}$  values used in the first row are noted at the top of each column, and every subsequent row uses a fraction of these values (1/5, 1/10, and 1/20). Each heatmap is compiled for a different value of  $\gamma_1$  shown at the top of each panel. The values of  $\beta_1$ ,  $\beta_2$ , and  $\beta_0$  are 2.01, 4.92, and 0.0032, respectively. **C) (Left panel)** Pulsed and continuous TF inputs, of an equivalent area, used in Figure 4D and S5C are superimposed for comparison of their area. Red and blue lines represent pulsed and continuous inputs, respectively. **(Middle and right panels)** Plot of TF and  $p_{on}$  as a function of time for  $k_d = 46$ , assuming a fast promoter, therefore generating  $p_{on, QSSA}$  calculated as  $p_{on, QSSA} = TF/(TF + k_d)$ . **(Top panels)** Red and blue lines represent pulsed and continuous TF inputs, respectively. Gray lines and text denote equivalent area of TF input. The area labeled “a” represents the rise for both pulsed and continuous inputs. The area labeled “b” represents the fall of the pulsed input, and the equivalent area for the continuous input. The area labeled “c” represents a single pulse of the pulsed input, and the equivalent area of the continuous input. The area labeled “c” is equivalent to the sum of the areas labeled “a” and “b”. The areas labeled “a” and “b” are equivalent to each other. **(Bottom panels)** Red and blue lines represent  $p_{on, QSSA}$  in response to pulsed and continuous TF inputs, respectively. Gray shading denotes equivalent area of  $p_{on, QSSA}$  for continuous and pulsed inputs. Light red shading denotes excess  $p_{on, QSSA}$  area resulting from the rise and fall of the pulsed input. Inset shows the second  $p_{on}$  pulse at 200% resolution. **D) (left panel)** Output-Fluorescence plot as in Figure S5D,  $k_{on} = 0.1$  and  $k_{off} = 4.6$ . **(right panel)** Output-Fluorescence plot where  $k_{on} = 0.01$  and  $k_{off} = 0.46$ . **E)** Output-Fluorescence plot for a parameter set with higher gene expression in response to short pulses. Parameter values are:  $k_{on} = 1$ ,  $k_{off} = 0.8$ ,  $\beta_1 = 0.0001$ ,  $\beta_2 = 0.1$ ,  $\gamma_1 = 0.05$ ,  $\gamma_2 = 0.0083$ , and  $\beta_0 = 0.000001$ .  $k_{on}$  is multiplied by 1/2, 1/4, 1/8, 1/16, and 1/32. The red line represents protein resulting from pulsed inputs and the blue line from continuous inputs.

**Figure S6: Exploration of various models for pGYP7-YFP data, related to Figure 6. A) (left panel)** Schematic of the kinetic model, where the input is Crz1\*-CLASP nuclear localization (TF) and the output is fluorescent protein level (Protein). **(middle left panel)** Output-Fluorescence plot for pGYP7-YFP. Circles are experimentally measured values for at least 3 biological replicates, error bars are standard deviation of those values, while lines denote the output of the model for 200 parameter sets out of 10000 that maximize fits through data points. The solid line denotes the mean and shaded areas the standard deviation of the model outputs. Parameters are sampled ( $k_{on}$  from 0.0001-1,  $k_{off}$  from 0.0001-1,  $\beta_1$  from 0.0001-10,  $\beta_0$  from 0.000001-0.01) or set ( $\beta_2 = 0.06$ ,  $\gamma_1 = 0.05$ ,  $\gamma_2 = 0.0083$ ). **(middle right panel)** Dose response plot for pGYP7-YFP. The parameters that fit the Output-Fluorescence data are used to further fit the dose response of pGYP7-YFP using a best fit to least squared error criterion. Parameter sets below the mean of the least squared error distribution are plotted (solid black line is the mean generated by the model). The black dots are the experimentally measured dose response, and error bars represent standard deviation of at least 3 biological replicates. **(right panel)** The parameters that fit the Output-Fluorescence are then subject to cross-validation using an experiment where Crz1\*-CLASP expression is increased (expressed from a pTEF1 promoter), and cells are exposed to either short pulsed (2 minutes ON/10 minutes OFF) or continuous input (40 minutes of light). The model generated outputs (solid red and blue bar) are plotted with the experimental data (hashed red and blue bar). The gray bars are samples not exposed to light. **B) (left panel)** Schematic of a model with cooperativity. **(middle left panel)** Same plots as in (A, middle left panel), with 2481 parameter sets for this model. Parameters are sampled ( $k_d$  from 0.01-100,  $n$  from 0.5-4,  $\beta_1$  from 0.0001-10,  $\beta_0$  from 0.000001-0.01) or set ( $\beta_2 = 0.06$ ,  $\gamma_1 = 0.05$ ,  $\gamma_2 = 0.0083$ ). **(middle right panel, right panel)** Plotted in the same manner as in (A, middle right panel, right panel) with 35 parameter sets. **C) (left panel)** Schematic of a 2-state model with thresholding on the activation constant,  $k_{on}$ . **(middle left panel)** Same plots as in (A, middle left panel), with 148 parameter sets for this model. Parameters are sampled ( $r_{on}$  from 0.1-100,  $r_{off}$  from 0.1-100,  $\beta_1$  from 0.0001-10,  $\beta_0$  from 0.000001-0.01) or set ( $\beta_2 = 0.06$ ,  $\gamma_1 = 0.05$ ,  $\gamma_2 = 0.0083$ , threshold = 0.5). **(middle right panel, right panel)** Plotted in the same manner as in (A, middle right panel, right panel) with 16 parameter sets. **D) (left panel)** Schematic of a two-state promoter model with a thresholded promoter inactivation constant,  $k_{off}$ . **(middle left panel)** Same plots as in (A, middle left panel), with 380 parameter sets for this model. Parameters are sampled ( $r_{on}$  from 0.0001-1,  $r_{off}$  from 0.0001-1,  $\beta_1$  from 0.0001-10,  $\beta_0$  from 0.000001-0.01, threshold from 0-2.7) or set ( $\beta_2 = 0.06$ ,  $\gamma_1 = 0.05$ ,  $\gamma_2 = 0.0083$ ). **(middle right panel, right panel)** Plotted in the same

manner as in (A, middle right panel, right panel) with 52 parameter sets. **E) (left panel)** Schematic of a 3-state model with thresholding in the inactivation constant,  $r_{\text{off}}$ , between the promoter off-states,  $p_0$  and  $p_{\text{off}}$ , and no TF dependence in the step before promoter activation. **(middle left panel)** Same plots as in (A, middle left panel), with 423 parameter sets for this model. Parameters are sampled ( $r_{\text{on}}$  from 0.1-100,  $r_{\text{off}}$  from 0.1-100,  $k_{\text{on}}$  from 0.0001-1,  $k_{\text{off}}$  from 0.0001-1,  $\beta_1$  from 0.0001-10,  $\beta_0$  from 0.000001-0.01, threshold from 0-2.7) or set ( $\beta_2 = 0.06$ ,  $\gamma_1 = 0.05$ ,  $\gamma_2 = 0.0083$ ). **(middle right panel, right panel)** Plotted in the same manner as in (A, middle right panel, right panel) with 84 parameter sets. **F) (left panel)** Schematic of a 3-state model with constant rate of transition from  $p_0$  to  $p_{\text{off}}$ . **(middle left panel)** Same plots as in (A, middle left panel), with 1288 parameter sets for this model. Parameters are sampled ( $r_{\text{on}}$  from 0.1-100,  $r_{\text{off}}$  from 0.1-100,  $k_{\text{on}}$  from 0.0001-1,  $k_{\text{off}}$  from 0.0001-1,  $\beta_1$  from 0.0001-10,  $\beta_0$  from 0.000001-0.01) or set ( $\beta_2 = 0.06$ ,  $\gamma_1 = 0.05$ ,  $\gamma_2 = 0.0083$ ). **(middle right panel, right panel)** Plotted in the same manner as in (A, middle right panel, right panel) with 16 parameter sets. **G) (left panel)** Schematic of 3-state model with linear dependence on TF in both transitions from  $p_0$  to  $p_{\text{off}}$  and  $p_{\text{off}}$  to  $p_{\text{on}}$ . **(middle left panel)** Same plots as in (A, middle left panel), with 1638 parameter sets for this model. Parameters are sampled ( $r_{\text{on}}$  from 0.1-100,  $r_{\text{off}}$  from 0.1-100,  $k_{\text{on}}$  from 0.0001-1,  $k_{\text{off}}$  from 0.0001-1,  $\beta_1$  from 0.0001-10,  $\beta_0$  from 0.000001-0.01) or set ( $\beta_2 = 0.06$ ,  $\gamma_1 = 0.05$ ,  $\gamma_2 = 0.0083$ ). **(middle right panel, right panel)** Plotted, in the same manner as in (A, middle right panel, right panel) with 228 parameter sets. **H) (left panel)** Schematic of the 3-state model with thresholding in the activation constant,  $r_{\text{on}}$ , between promoter off-states,  $p_0$  and  $p_{\text{off}}$ , and linear dependence on TF in transition from  $p_{\text{off}}$  to  $p_{\text{on}}$ . **(middle left panel)** Same plots as in (A, middle left panel), with 1649 parameter sets for this model. Parameters are sampled ( $r_{\text{on}}$  from 0.1-100,  $r_{\text{off}}$  from 0.1-100,  $k_{\text{on}}$  from 0.0001-1,  $k_{\text{off}}$  from 0.0001-1,  $\beta_1$  from 0.0001-10,  $\beta_0$  from 0.000001-0.01, threshold from 0-0.5) or set ( $\beta_2 = 0.06$ ,  $\gamma_1 = 0.05$ ,  $\gamma_2 = 0.0083$ ). **(middle right panel, right panel)** Plotted in the same manner as in (A, middle right panel, right panel) with 455 parameter sets. **I) (left panel)** Schematic of the 3-state model with thresholding in the inactivation constant,  $r_{\text{off}}$ , between promoter off-states,  $p_0$  and  $p_{\text{off}}$  and linear dependence on TF in transition from  $p_{\text{off}}$  to  $p_{\text{on}}$ . **(middle left panel)** Same plots as in (A, middle left panel), with 96 parameter sets for this model. Parameters are sampled ( $r_{\text{on}}$  from 0.1-100,  $r_{\text{off}}$  from 0.1-100,  $k_{\text{on}}$  from 0.0001-1,  $k_{\text{off}}$  from 0.0001-1,  $\beta_1$  from 0.0001-10,  $\beta_0$  from 0.000001-0.01, threshold from 0-0.5) or set ( $\beta_2 = 0.06$ ,  $\gamma_1 = 0.05$ ,  $\gamma_2 = 0.0083$ ). **(middle right panel, right panel)** Plotted in the same manner as in (A, middle right panel, right panel) with 25 parameter sets.

**Figure S7: Exploration of the models that fit pGYP7-YFP, related to Figure 6. A)**

Comparison of the 3-state models with either  $r_{on}$  or  $r_{off}$  thresholding in the transition from  $p_0$  to  $p_{off}$

**(upper panel)** Schematic of the 3-state model with thresholding in the activation rate constant,  $r_{on}$ , between promoter off-states  $p_0$  and  $p_{off}$ . **(middle panel)** Heatmap of slope ratio in the  $\log_{10}(k_{on}/k_{off})$ - $\log_{10}(r_{on}/r_{off})$  plane.  $r_{on}$  is set to 0.02 and  $k_{on} = 0.6$ . Parameters are sampled ( $r_{off}$  from 0.0002-0.02,  $k_{off}$  from 0.002-0.2) or set ( $\beta_1 = 0.0001$ ,  $\beta_2 = 0.06$ ,  $\gamma_1 = 0.05$ ,  $\gamma_2 = 0.0083$ , threshold = 0.5,  $\beta_0 = 0.000001$ ). **(lower panel)** Same heatmap as in (A, middle panel) except with  $r_{on}$  set to 2, and  $r_{off}$  ranges from 0.02-2. **B) (upper panel)** Schematic of the 3-state model with thresholding in the inactivation constant,  $r_{off}$ , between promoter OFF-states,  $p_0$  and  $p_{off}$ . **(middle panel)** Same heatmap as in (A, middle panel) with  $r_{on}$  is set to 0.25 and  $k_{on} = 0.25$ , that is previously described in Figure 6E. Parameters are sampled ( $r_{off}$  from 0.0025-2.5,  $k_{off}$  from 0.0025-0.25) or set ( $\beta_1 = 0.0001$ ,  $\beta_2 = 0.06$ ,  $\gamma_1 = 0.05$ ,  $\gamma_2 = 0.0083$ , threshold = 0.5,  $\beta_0 = 0.000001$ ). **(lower panel)** Same heatmap as in (B, middle panel) except with  $r_{on}$  set to 2.5, and  $r_{off}$  ranges from 0.025-25. **C-D) Additional parameter requirements of the 3-state  $r_{off}$  threshold model for fitting pGYP7-YFP. (upper panels)** Output-Fluorescence plots are generated by the model for different parameter sets that correspond to points 3 and 4 in the heatmap in B. The slope ratio for point 3 is 1.05 with  $\log_{10}(k_{on}/k_{off}) = -1.58$  and  $\log_{10}(r_{on}/r_{off}) = 0.6$ . The slope ratio for point 4 is 1.25 with  $\log_{10}(k_{on}/k_{off}) = 0.1$  and  $\log_{10}(r_{on}/r_{off}) = -0.89$ . Point 3 is chosen to highlight the effect of decreasing  $r_{off}$ , while Point 4 is chosen to highlight the effect of decreasing  $k_{off}$ . **(middle panels)** Example of a time course of promoter state  $p_0$  for a light input that produces the equivalent of 40 minutes (dotted line in upper panel) in nuclear localization either continuously or in short pulses. Solid lines are the  $p_0$  activity while shading denotes TF nuclear localization. The black double arrow denotes the maximum depletion of the  $p_0$  state for the pulsed input. **(lower panels)** Example of a time course of promoter activity  $p_{on}$  for a light input that produces the equivalent of 40 minutes (dotted line in upper panel) in nuclear localization either continuously or in short pulses, similar to the (middle panels). The red and blue hashing represents residual promoter activity beyond the nuclear localization input. The red residual promoter activity is repeated 15 times while the blue residual activity is repeated one time. The  $\blacktriangle$  bar denotes the difference between the amplitudes generated by the 2 minute pulsed and 40 minute continuous input. **E)** Correlation of nucleosome occupancy and sensitivity to pulsing. Heatmap of H3 occupancy for the Crz1 target genes as specified by Yoshimoto 2002. H3 occupancy is defined as counts of H3 enrichment over the IgG antibody, which is a control for no pull down of histones. The dataset and determination of start sites are obtained from Sen et al., 2015 and Malabat et al.,



2015, respectively. The software deepTools 2.0 is used to compute the H3 occupancy values. -1 and +1 kb from the transcription start site (TSS) is used. The positions of YPS1, CMK2, and GYP7 in the heatmap are denoted with black triangles. **F)** Slope ratios of Crz1 target genes as a function of their mean H3 nucleosome occupancy scores averaged from -1kb to the Transcription Start Site (TSS). The correlation coefficient is  $r^2 = 0.26$ .

**Figure S8: Slope ratio  $N_p/N_c$  of number of transcripts N is strongly correlated with protein slope ratio, related to Figures 4-5 and STAR Methods. A)** Heatmap of  $N_p/N_c$  for increasing  $k_d$  and different values of  $k_{on}$  and  $k_{off}$ . Each column has a given value of  $k_d$  and each row has different values for  $k_{on}$  and  $k_{off}$  that produce the same  $k_d$ . The nominal  $k_{on}$  and  $k_{off}$  values used in the first row are noted at the top, and every subsequent row uses a fraction of these values (1/5, 1/10, and 1/20). **B)** Plot of  $N$ , total transcripts produced, as a function of TF nuclear fluorescence AUC. Left Panel:  $k_{on} = 2$ ,  $k_{off} = 4.6$ ,  $k_d = 2.3$  and  $N_p/N_c = 1.25$ . Right Panel:  $k_{on} = 0.1$ ,  $k_{off} = 4.6$ ,  $k_d = 46$  and  $N_p/N_c = 1.02$ . For both panels,  $\beta_1 = 2$ ,  $\gamma_1 = 0.06$ ,  $\beta_2 = 4.92$ ,  $\gamma_2 = 0.0083$ ,  $\beta_0 = 0.0032$ . **C)** Plot of slope ratio  $N_p/N_c$  of transcripts versus protein slope ratio.  $N_p$  are the transcripts produced by  $TF_p(t)$  while  $N_c$  are those produced by  $TF_c(t)$ . Each dot represents values computed using the model for a parameter set that fit the protein timecourse and Output-Fluorescence data. Left Panel: data for pYPS1-YFP (also plotted in Figure 5C). Right Panel: Same plot as left panel for pCMK2-YFP (also plotted in Figure 5C). **D)** Time-dependent transcription factor concentration  $TF(t)$  for the continuous ( $TF_c(t)$ , left plot) and pulsed ( $TF_p(t)$ , right plot) cases. Here  $\int TF_c(t)dt = \int TF_p(t)dt$  and both have the same initial rise (shown between 0 and  $\tau_{r,c}$  (left graph) and 0 and  $\tau_{r,p}$  (right graph)) and final shutoff behavior (shown between  $\tau_{f,c}$  and end of input (left graph) and  $\tau_{f,p}$  and end of input (right graph)).

**Figure S9. Simulations of input sequences that accompany theoretical analysis, related to Figure 4 and STAR Methods.** For all simulations  $l=6$  ( $l$  is the number of inputs),  $k_d=3$ ,  $k_{off} = .33$ ,  $k_{on} = .11$ , and  $\beta_1 = 1$ . **A)** Sequence of inputs used and simulation results for them. (Top panel) Sequence of TF inputs with progressively lower plateaus at successive times. (Top Middle panel) Plots of  $p_{on}(t)$  for the different inputs. (Bottom Middle panel) Plots of  $p_{on}$  versus cumulative TF area ( $\int_0^t TF(v) dv$ ) for the different inputs. (Bottom plot) Cumulative transcripts ( $\beta_1/k_d \int_0^t (1-p_{on}(v))TF(v)dv$ ) versus cumulative TF area. **B)** Simulation results of cumulative transcripts for a class of inputs that have the same total accumulated TF area. (Top panel) Sequence of TF inputs with progressively lower plateaus at successive times that later rise (step

up) to the level of  $TF_c(t)$  shown in dark blue, and then shut off. Light blue line is  $TF_p(t)$  with 2 pulses. (Top middle panel) First adjacent input pairs with dark blue being  $TF_{\alpha_1}(t)$  and red being  $TF_{\alpha_2}(t)$ . The plot shows the time of divergence  $t=t_0$  for the first two inputs (where  $TF_{\alpha_2}(t)$  first drops to its plateau), the time  $t=t_0+\alpha_1/\alpha_2 \sigma^*$  when  $TF_{\alpha_2}(t)$  jumps back up to  $TF_{\alpha_1}(t)$ , and the time  $t=t_0+\sigma^*$  where  $TF_{\alpha_1}(t)$  has the same corresponding accumulated TF area as  $TF_{\alpha_2}(t)$  does at  $t=t_0 + \alpha_1/\alpha_2 \sigma^*$ . (Bottom middle panel) Second adjacent input pairs (red is  $TF_{\alpha_1}(t)$  and orange is  $TF_{\alpha_2}(t)$ ) with similarly marked time points as in panel above it. (Bottom panel) Cumulative transcripts versus cumulative TF area for the inputs in the top panel. **C**) Extending the class of inputs with equivalent total accumulated TF area from two (panel B) to 3 pulses. (Top panel): Sequence of TF inputs with progressively lower plateaus at successive times that later rise (step up) to the level of  $TF_c(t)$  shown in dark blue. Same as in panel B but for 3 pulses. (Top Middle Panel) First adjacent input pairs with dark blue being  $TF_{\alpha_1}(t)$  and red being  $TF_{\alpha_2}(t)$ . There are two additional time labels relative to those in (B). For the  $TF_{\alpha_2}(t)$  input,  $t=t_1(\alpha_2)$  is the time at which  $TF_{\alpha_2}(t)$  drops a second time to its plateau. For the  $TF_{\alpha_1}(t)$  input,  $t=t_1(\alpha_1)$  is the time at which  $TF_{\alpha_1}(t)$  has the same TF area as  $TF_{\alpha_2}(t)$  does at  $t=t_1(\alpha_2)$ . (Bottom middle panel) Second adjacent input pairs (red is  $TF_{\alpha_1}(t)$  and orange is  $TF_{\alpha_2}(t)$ ) with similarly marked time points as in panel above it. (Bottom panel): Cumulative transcripts versus cumulative TF(t) area for 3 pulse sequence of inputs shown in top panel. **D**) Extending the class of inputs to M pulses. Plots showing time locations when  $TF_{\alpha_2}(t)$  drops to its first, second, and third plateaus for the first adjacent input pair (left plot) and second adjacent input pair (right plot). The times  $t=t_0$ ,  $t=t_1(\alpha_2)$  and  $t=t_2(\alpha_2)$  are the ordered locations when  $TF_{\alpha_2}(t)$  drops to the corresponding plateau. For the  $TF_{\alpha_1}(t)$  input, the times  $t=t_1(\alpha_1)$  and  $t=t_2(\alpha_1)$  map to the same TF area for  $TF_{\alpha_1}(t)$  as  $t=t_1(\alpha_2)$  and  $t=t_2(\alpha_2)$  does for  $TF_{\alpha_2}(t)$ . **E**) Simulation results for the 20 pulse case. Left plot: All inputs. Dark blue corresponds to the continuous input  $TF_c(t)$  of equal area to the other inputs. Light blue corresponds to the pulsed input  $TF_p(t)$  (20 pulses). Right plot: Cumulative transcripts versus cumulative TF(t) area.

## Supplementary Table Captions

**Table S2: List of strains, related to all Figures**

**Table S3: List of plasmids used to build strains, related to all Figures**

**Table S4: OptoPlate light intensity characterization, related to Figures 2 and S3**

Table S2

| Name    | Base Strain | Genome                                                                                                                                                                                                                                                          | Description                                                                 | Figure Correspondence         | Plasmid        |
|---------|-------------|-----------------------------------------------------------------------------------------------------------------------------------------------------------------------------------------------------------------------------------------------------------------|-----------------------------------------------------------------------------|-------------------------------|----------------|
| yWCD230 | BY4741      | BY4741, HIS3 repaired                                                                                                                                                                                                                                           | Wild type strain for plasmid integration                                    | Supp Figure 2C                |                |
| yLO213  | BY4741      | ura3: ConS-pRPL18B-Zdk1-mScarlet-yeLANS-tADH1-Con1-pRPL18B-Hs_RGS2(33-67)_13aa-iRFP713 (iRFP)-asLOV2(404-546)-tPGK1-ConE-URA3 (pSc-native-tSc)<br>leu2: p43_8(8x)-Venus-tPGK1-LEU2 (pSc-native-tSc)                                                             | mScarlet-CLASP strain used for microscopy studies (medium expression level) | Figure 1C-E; Supp Figure 2D-G | pLO405, pAN736 |
| yLO133  | BY4741      | ura3: ConS-pRPL18B-Zdk1-VP16-ZF43_8-mScarlet-yeLANS-tADH1-Con1-pRPL18B-Hs_RGS2(33-67)_13aa-iRFP713 (iRFP)-asLOV2(404-546)-tPGK1-ConE-URA3 (pSc-native-tSc)<br>leu2: p43_8(8x)-Venus-tPGK1-LEU2 (pSc-native-tSc)                                                 | SynTF-CLASP                                                                 | Figure 2; Supp Figure 3A-B    | pLO278, pAN736 |
| yLO204  | BY4741      | leu2: ConLS'-pPHO84-Venus-tPGK1-ConRE'-LEU2 (pSc-native-tSc)<br>ura3: ConS-pRPL18B-Zdk1-Pho4-mScarlet-yeLANS-tADH1-Con1-pTDH3-Hs_RGS2(33-67)_13aa-iRFP713 (iRFP)-asLOV2(404-546)-tPGK1-ConE-URA3 (pSc-native-tSc)<br>PHO4::HIS3                                 | Pho4-CLASP                                                                  | Figure 2; Supp Figure 3A,C    | pLO388, pLO363 |
| yLO228  | BY4741      | ura3: ConS-pRPL18B-Zdk1-Msn2-mScarlet-yeLANS-tADH1-Con1-pTDH3-Hs_RGS2(33-67)_13aa-iRFP713 (iRFP)-asLOV2(404-546)-tPGK1-ConE'-URA3 (pSc-native-tSc)<br>MSN4::URA3 (broken with 5'FOA)<br>MSN2::HIS3<br>leu2: ConS-pHsp12-Venus-tPGK1-ConE'-LEU2 (pSc-native-tSc) | Msn2-CLASP                                                                  | Figure 2; Supp Figure 3A,D    | pLO361, pLO352 |
| yLO240  | BY4741      | ura3: ConLS'-pTDH3-TOM20_TMD(1-39)-iRFP713 (iRFP)-asLOV2(404-546)-tPGK1-ConRE'-URA3 (pSc-native-tSc)                                                                                                                                                            | Mito-LOVTRAP (high expression level)                                        | Figure 1B; Supp Figure 2C     | pLO485         |
| yLO241  | BY4741      | ura3: ConLS'-pRPL18B-TOM20_TMD(1-39)-iRFP713 (iRFP)-asLOV2(404-546)-tPGK1-ConRE'-URA3 (pSc-native-tSc)                                                                                                                                                          | Mito-LOVTRAP (medium expression level)                                      | Supp Figure 2C                | pLO486         |
| yLO242  | BY4741      | ura3: ConLS'-pREV1-TOM20_TMD(1-39)-iRFP713 (iRFP)-asLOV2(404-546)-tPGK1-ConRE'-URA3 (pSc-native-tSc)                                                                                                                                                            | Mito-LOVTRAP (low expression level)                                         | Supp Figure 2C                | pLO487         |
| yLO243  | BY4741      | ura3: ConLS'-pTDH3-Hs_RGS2(33-67)_13aa-iRFP713 (iRFP)-asLOV2(404-546)-tPGK1-ConRE'-URA3 (pSc-native-tSc)                                                                                                                                                        | PM-LOVTRAP (high expression level)                                          | Figure 1B; Supp Figure 2C     | pLO488         |
| yLO244  | BY4741      | ura3: ConLS'-pRPL18B-Hs_RGS2(33-67)_13aa-iRFP713 (iRFP)-asLOV2(404-546)-tPGK1-ConRE'-URA3 (pSc-native-tSc)                                                                                                                                                      | PM-LOVTRAP (medium expression level)                                        | Supp Figure 2C                | pLO489         |
| yLO245  | BY4741      | ura3: ConLS'-pREV1-Hs_RGS2(33-67)_13aa-iRFP713 (iRFP)-asLOV2(404-546)-tPGK1-ConRE'-URA3 (pSc-native-tSc)                                                                                                                                                        | PM-LOVTRAP (low expression level)                                           | Supp Figure 2C                | pLO490         |
| yLO210  | BY4741      | ura3: ConS-pTDH3-Zdk1-mScarlet-yeLANS-tADH1-Con1-pTDH3-Hs_RGS2(33-67)_13aa-iRFP713 (iRFP)-asLOV2(404-546)-tPGK1-ConE-URA3 (pSc-native-tSc)<br>leu2: p43_8(8x)-Venus-tPGK1-LEU2 (pSc-native-tSc)                                                                 | mScarlet-CLASP (high expression level)                                      | Supp Figure 2D                | pLO402, pAN736 |
| yLO215  | BY4741      | ura3: ConS-pREV1-Zdk1-mScarlet-yeLANS-tADH1-Con1-pREV1-Hs_RGS2(33-67)_13aa-iRFP713 (iRFP)-asLOV2(404-546)-tPGK1-ConE-URA3 (pSc-native-tSc)<br>leu2: p43_8(8x)-Venus-tPGK1-LEU2 (pSc-native-tSc)                                                                 | mScarlet-CLASP (low expression level)                                       | Supp Figure 2D                | pLO407, pAN736 |
| yLO216  | BY4741      | ura3: ConS-pTDH3-Zdk1-mScarlet-yeLANS-tADH1-Con1-pTDH3-TOM20_TMD(1-39)-iRFP713 (iRFP)-asLOV2(404-546)-tPGK1-ConE-URA3 (pSc-native-tSc)<br>leu2: p43_8(8x)-Venus-tPGK1-LEU2 (pSc-native-tSc)                                                                     | Zdk1-mScarlet-yeLANS + mito-LOVTRAP (high expression level)                 | Supp Figure 2D                | pLO414, pAN736 |
| yLO219  | BY4741      | ura3: ConS-pRPL18B-Zdk1-mScarlet-yeLANS-tADH1-Con1-pRPL18B-TOM20_TMD(1-39)-iRFP713 (iRFP)-asLOV2(404-546)-tPGK1-ConE-URA3 (pSc-native-tSc)<br>leu2: p43_8(8x)-Venus-tPGK1-LEU2 (pSc-native-tSc)                                                                 | Zdk1-mScarlet-yeLANS + mito-LOVTRAP (medium expression level)               | Supp Figure 2D                | pLO417, pAN736 |
| yLO221  | BY4741      | ura3: ConS-pREV1-Zdk1-mScarlet-yeLANS-tADH1-Con1-pREV1-TOM20_TMD(1-39)-iRFP713 (iRFP)-asLOV2(404-546)-tPGK1-ConE-URA3 (pSc-native-tSc)<br>leu2: p43_8(8x)-Venus-tPGK1-LEU2 (pSc-native-tSc)                                                                     | Zdk1-mScarlet-yeLANS + mito-LOVTRAP (low expression level)                  | Supp Figure 2D                | pLO419, pAN736 |
| yLO152  | BY4741      | ura3: ConS-pRPL18B-VP16-ZF43_8-mScarlet-yeLANS-tADH1-Con1-pRPL18B-Hs_RGS2(33-67)_13aa-iRFP713 (iRFP)-asLOV2(404-546)-tPGK1-ConE-URA3 (pSc-native-tSc)<br>leu2: p43_8(8x)-Venus-tPGK1-LEU2 (pSc-native-tSc)                                                      | SynTF-yeLANS                                                                | Supp Figure 2A                | pLO316, pAN736 |
| yLO179  | BY4741      | ura3: ConS-pRPL18B-Msn2-mScarlet-yeLANS-tADH1-Con1-pTDH3-Hs_RGS2(33-67)_13aa-iRFP713 (iRFP)-asLOV2(404-546)-tPGK1-ConE'-URA3 (pSc-native-tSc)<br>MSN2::HIS3<br>leu2: ConS-pHsp12-Venus-tPGK1-ConE'-LEU2 (pSc-native-tSc)                                        | Msn2-yeLANS                                                                 | Supp Figure 2A                | pLO366, pLO352 |
| yLO171  | BY4741      | ura3: ConS-pRPL18B-VP16-ZF43_8-mScarlet-NLS11-tADH1-Con1-pRPL18B-Hs_RGS2(33-67)_13aa-iRFP713 (iRFP)-asLOV2(404-546)-tPGK1-ConE-URA3 (pSc-native-tSc)<br>leu2: p43_8(8x)-Venus-tPGK1-LEU2 (pSc-native-tSc)                                                       | SynTF-NLS11 for comparison to SynTF-CLASP                                   | Supp Figure 3B                | pLO344, pAN736 |
| yLO236  | BY4741      | ura3: ConS-pRPL18B-VP16-ZF43_8-mScarlet-tADH1-Con1-pRPL18B-Hs_RGS2(33-67)_13aa-iRFP713 (iRFP)-asLOV2(404-546)-tPGK1-ConE-URA3 (pSc-native-tSc)<br>leu2: p43_8(8x)-Venus-tPGK1-LEU2 (pSc-native-tSc)                                                             | SynTF-mScarlet for comparison to SynTF-CLASP                                | Supp Figure 3B                | pLO411, pAN736 |
| yLO224  | BY4741      | ura3: ConS-pRPL18B-Pho4-mScarlet-tADH1-Con1-pTDH3-Hs_RGS2(33-67)_13aa-iRFP713 (iRFP)-asLOV2(404-546)-tPGK1-ConE-URA3 (pSc-native-tSc)<br>leu2: ConLS'-pPHO84-Venus-tPGK1-ConRE'-LEU2 (pSc-native-tSc)<br>PHO4::HIS3                                             | Pho4-mScarlet for comparison to Pho4-CLASP                                  | Supp Figure 3C                | pLO412, pLO388 |
| yLO225  | BY4741      | ura3: ConS-pRPL18B-Pho4-mScarlet-NLS11-tADH1-Con1-pTDH3-Hs_RGS2(33-67)_13aa-iRFP713 (iRFP)-asLOV2(404-546)-tPGK1-ConE-URA3 (pSc-native-tSc)<br>leu2: ConLS'-pPHO84-Venus-tPGK1-ConRE'-LEU2 (pSc-native-tSc)<br>PHO4::HIS3                                       | Pho4-NLS11 for comparison to Pho4-CLASP                                     | Supp Figure 3C                | pLO465, pLO388 |

Table S2

|          |          |                                                                                                                                                                                                                                                           |                                                         |                                |                |
|----------|----------|-----------------------------------------------------------------------------------------------------------------------------------------------------------------------------------------------------------------------------------------------------------|---------------------------------------------------------|--------------------------------|----------------|
| yLO229   | BY4741   | ura3: ConS-pRPL18B-Msn2-mScarlet-NLS11-tADH1-Con1-pTDH3-Hs_RGS2(33-67)_13aa-iRFP713 (iRFP)-asLOV2(404-546)-tPGK1-ConE'-URA3 (pSc-native-tSc)<br>MSN4::URA3 (broken with 5'FOA)<br>MSN2::HIS3<br>leu2: ConS-pHsp12-Venus-tPGK1-ConE'-LEU2 (pSc-native-tSc) | Msn2-NLS11 for comparison to Msn2-CLASP                 | Supp Figure 3D                 | pLO463, pLO352 |
| yLO237   | BY4741   | ura3: ConS-pRPL18B-Msn2-mScarlet-tADH1-Con1-pTDH3-Hs_RGS2(33-67)_13aa-iRFP713 (iRFP)-asLOV2(404-546)-tPGK1-ConE'-URA3 (pSc-native-tSc)<br>MSN4::URA3 (broken with 5'FOA)<br>MSN2::HIS3<br>leu2: ConS-pHsp12-Venus-tPGK1-ConE'-LEU2 (pSc-native-tSc)       | Msn2-mScarlet for comparison to Msn2-CLASP              | Supp Figure 3D                 | pLO480, pLO352 |
| yLO209   | BY4741   | ura3: ConS-pRPL18B-Zdk1-Gal4-mScarlet-yeLANS-tADH1-Con1-pTDH3-Hs_RGS2(33-67)_13aa-iRFP713 (iRFP)-asLOV2(404-546)-tPGK1-ConE'-URA3 (pSc-native-tSc)<br>leu2: ConS-pGal1-Venus-tPGK1-ConE'-LEU2 (pSc-native-tSc)<br>GAL4::HIS5 (JSO His)                    | Gal4-mScarlet                                           | Supp Figure 3E                 | pLO413, pAN160 |
| yLO177   | BY4741   | ura3: ConS-pRPL18B-Zdk1-Gal4-mScarlet-tADH1-Con1-pTDH3-Hs_RGS2(33-67)_13aa-iRFP713 (iRFP)-asLOV2(404-546)-tPGK1-ConE'-URA3 (pSc-native-tSc)<br>leu2: ConS-pGal1-Venus-tPGK1-ConE'-LEU2 (pSc-native-tSc)<br>GAL4::HIS5 (JSO His)                           | Gal4-CLASP                                              | Supp Figure 3E-G               | pLO364, pAN160 |
| yAHN437  | BY4741   | leu2: p43_8(8x)-Venus-tPGK1-LEU2 (pSc-native-tSc)                                                                                                                                                                                                         | Background strain                                       | Supp Figure 2D                 | pAN736         |
| ySYC1-78 | yBMH35   | W303a TPK1/2/3-AS Nhp6a-iRFP (Kan) trp1::pAdh1-mCherry-PEF-NESLOVNLs IRFP-nuclear                                                                                                                                                                         | Original Yumerefendi LANS construct                     | Supp Figure 2B                 | pSYC084        |
| ySYC1-79 | yBMH35   | W303a TPK1/2/3-AS Nhp6a-iRFP (Kan) trp1::pAdh1-mCherry-PEF-NESLOVNLsvar#3 IRFP-nuclear                                                                                                                                                                    | class 2 raaKRpRtt                                       | Supp Figure 2B                 | pSYC085        |
| ySYC1-80 | yBMH35   | W303a TPK1/2/3-AS Nhp6a-iRFP (Kan) trp1::pAdh1-mCherry-PEF-NESLOVNLsvar#5 IRFP-nuclear                                                                                                                                                                    | class 2 paaKRpRtt                                       | Supp Figure 2B                 | pSYC087        |
| ySYC1-81 | yBMH35   | W303a TPK1/2/3-AS Nhp6a-iRFP (Kan) trp1::pAdh1-mCherry-PEF-NESLOVNLsvar#8 IRFP-nuclear                                                                                                                                                                    | class 2 apaKRaRtt                                       | Supp Figure 2B                 | pSYC088        |
| ySYC2-1  | yBMH35   | W303a TPK1/2/3-AS Nhp6a-iRFP (Kan) trp1::pAdh1-mCherry-PEF-NESLOVNLsvar#11 IRFP-nuclear                                                                                                                                                                   | class 3 aaaKRswmaf                                      | Figure 1B; Supp Figure 2B      | pSYC090        |
| ySYC2-2  | yBMH35   | W303a TPK1/2/3-AS Nhp6a-iRFP (Kan) trp1::pAdh1-mCherry-PEF-NESLOVNLsvar#14 IRFP-nuclear                                                                                                                                                                   | class 3 aaaKRswmaf                                      | Supp Figure 2B                 | pSYC091        |
| ySYC2-3  | yBMH35   | W303a TPK1/2/3-AS Nhp6a-iRFP (Kan) trp1::pAdh1-mCherry-PEF-NESLOVNLsvar#15 IRFP-nuclear                                                                                                                                                                   | class 3 aaaKRswmaf                                      | Supp Figure 2B                 | pSYC092        |
| ySYC2-4  | yBMH35   | W303a TPK1/2/3-AS Nhp6a-iRFP (Kan) trp1::pAdh1-mCherry-PEF-NESLOVNLsvar#20 IRFP-nuclear                                                                                                                                                                   | bipartite KRpatlandspaaKRR                              | Supp Figure 2B                 | pSYC093        |
| ySYC2-5  | yBMH35   | W303a TPK1/2/3-AS Nhp6a-iRFP (Kan) trp1::pAdh1-mCherry-PEF-NESLOVNLsvar#4 IRFP-nuclear                                                                                                                                                                    | class 2 raaKRIRtt                                       | Supp Figure 2B                 | pSYC086        |
| ySYC2-6  | yBMH35   | W303a TPK1/2/3-AS Nhp6a-iRFP (Kan) trp1::pAdh1-mCherry-PEF-NESLOVNLsvar#9 IRFP-nuclear                                                                                                                                                                    | class 2 paaKRICtt                                       | Supp Figure 2B                 | pSYC089        |
| ySYC2-7  | yBMH35   | W303a TPK1/2/3-AS Nhp6a-iRFP (Kan) trp1::pAdh1-mCherry-PEF-NESLOVNLsvar#24 IRFP-nuclear                                                                                                                                                                   | class 1 KRKRwendip                                      | Supp Figure 2B                 | pSYC094        |
| ySYC2-8  | yBMH35   | W303a TPK1/2/3-AS Nhp6a-iRFP (Kan) trp1::pAdh1-mCherry-PEF-NESLOVNLsvar#27 IRFP-nuclear                                                                                                                                                                   | class 1 psRKRKRdhyav                                    | Supp Figure 2B                 | pSYC095        |
| ySYC2-9  | yBMH35   | W303a TPK1/2/3-AS Nhp6a-iRFP (Kan) trp1::pAdh1-mCherry-PEF-NESLOVNLsvar#29 IRFP-nuclear                                                                                                                                                                   | class 1 tspsRKRKwdqv                                    | Supp Figure 2B                 | pSYC096        |
| ySYC1-62 | yBMH35   | W303a TPK1/2/3-AS Nhp6a-iRFP (Kan) trp1::pAdh1-Dot6-mCherry (TRP1) IRFP-nuclear                                                                                                                                                                           | stress-induced localization experiments for Dot6        | Supp Figure 1B                 | pJSO529        |
| ySYC1-70 | yBMH35   | W303a TPK1/2/3-AS Nhp6a-iRFP (Kan) trp1::pAdh1-Crz1-mCherry (TRP1) IRFP-nuclear                                                                                                                                                                           | stress-induced localization experiments for Crz1        | Supp Figure 1B                 | pJSO568        |
| ySYC1-71 | yBMH35   | W303a TPK1/2/3-AS Nhp6a-iRFP (Kan) trp1::pAdh1-Stb3-mCherry (TRP1) IRFP-nuclear                                                                                                                                                                           | stress-induced localization experiments for Stb3        | Supp Figure 1B                 | pJSO269        |
| ySYC1-72 | yBMH35   | W303a TPK1/2/3-AS Nhp6a-iRFP (Kan) trp1::pAdh1-Msn2-mCherry (TRP1) IRFP-nuclear                                                                                                                                                                           | stress-induced localization experiments for Msn2        | Supp Figure 1B                 | pJSO392        |
| ySYC1-74 | yBMH35   | W303a TPK1/2/3-AS Nhp6a-iRFP (Kan) trp1::pAdh1-Msn4-mCherry (TRP1) IRFP-nuclear                                                                                                                                                                           | stress-induced localization experiments for Msn4        | Supp Figure 1B                 | pJSO285        |
| ySYC1-76 | yBMH35   | W303a TPK1/2/3-AS Nhp6a-iRFP (Kan) trp1::pAdh1-Pho4-mCherry (TRP1) IRFP-nuclear                                                                                                                                                                           | stress-induced localization experiments for Pho4        | Supp Figure 1B                 | pJSO569        |
| ySYC5-36 | ySYC5-26 | w303a nhp6a::nhp6a-iRFP(KAN) crz1::sfGFP-CandHIS ura::pADH1-zdk-CRZ1(ALA)-mCherry-yeLANS;pTDH3-Hs_RGS2(33-67)_13aa-iRFP713 (iRFP)-asLOV2(404-546)(URA) leu::pYps1-Venus(LEU)                                                                              | promoter fusions driven by Crz1*-CLASP; pYps1-YFP       | Figure 3-5; Supp Figure 4H     | pSYC332        |
| ySYC5-37 | ySYC5-26 | w303a nhp6a::nhp6a-iRFP(KAN) crz1::sfGFP-CandHIS ura::pADH1-zdk-CRZ1(ALA)-mCherry-yeLANS;pTDH3-Hs_RGS2(33-67)_13aa-iRFP713 (iRFP)-asLOV2(404-546)(URA) leu::pGyp7-Venus(LEU)                                                                              | promoter fusions driven by Crz1*-CLASP; pGyp7-YFP       | Figure 3, 6; Supp Figure 4J, 6 | pSYC392        |
| ySYC5-38 | ySYC5-26 | w303a nhp6a::nhp6a-iRFP(KAN) crz1::sfGFP-CandHIS ura::pADH1-zdk-CRZ1(ALA)-mCherry-yeLANS;pTDH3-Hs_RGS2(33-67)_13aa-iRFP713 (iRFP)-asLOV2(404-546)(URA) leu::pPut1-Venus(LEU)                                                                              | promoter fusions driven by Crz1*-CLASP; pPut1-YFP       | Figure 3C                      | pSYC393        |
| ySYC5-40 | ySYC5-26 | w303a nhp6a::nhp6a-iRFP(KAN) crz1::sfGFP-CandHIS ura::pADH1-zdk-CRZ1(ALA)-mCherry-yeLANS;pTDH3-Hs_RGS2(33-67)_13aa-iRFP713 (iRFP)-asLOV2(404-546)(URA) leu::pCmk2-Venus(LEU)                                                                              | promoter fusions driven by Crz1*-CLASP; pCmk2-YFP       | Figure 3-5; Supp Figure 4I     | pSYC395        |
| ySYC5-43 | ySYC5-26 | w303a nhp6a::nhp6a-iRFP(KAN) crz1::sfGFP-CandHIS ura::pADH1-zdk-CRZ1(ALA)-mCherry-yeLANS;pTDH3-Hs_RGS2(33-67)_13aa-iRFP713 (iRFP)-asLOV2(404-546)(URA) leu::pEna1-Venus(LEU)                                                                              | promoter fusions driven by Crz1*-CLASP; pEna1-YFP       | Figure 3C                      | pSYC398        |
| ySYC5-45 | ySYC5-26 | w303a nhp6a::nhp6a-iRFP(KAN) crz1::sfGFP-CandHIS ura::pADH1-zdk-CRZ1(ALA)-mCherry-yeLANS;pTDH3-Hs_RGS2(33-67)_13aa-iRFP713 (iRFP)-asLOV2(404-546)(URA) leu::pMep1-Venus(LEU)                                                                              | promoter fusions driven by Crz1*-CLASP; pMep1-YFP       | Figure 3C                      | pSYC400        |
| ySYC5-34 | ySYC5-26 | w303a nhp6a::nhp6a-iRFP(KAN) crz1::sfGFP-CandHIS ura::pADH1-zdk-CRZ1(ALA)-mCherry-yeLANS;pTDH3-Hs_RGS2(33-67)_13aa-iRFP713 (iRFP)-asLOV2(404-546)(URA) leu::pPun1-Venus(LEU)                                                                              | promoter fusion driven by Crz1*-CLASP; pPun1-YFP        | Supp Figure 4E, 4D-F           | pSYC331        |
| ySYC5-27 | ySYC5-11 | w303a nhp6a::nhp6a-iRFP(KAN) crz1::sfGFP-CandHIS ura::pADH1-CRZ1(WT)-mCherry(URA) leu::pPun1-Venus(LEU)                                                                                                                                                   | Crz1 WT for CaCl2 experiment; flow; mseq                | Supp Figure 4E, F              | pSYC331        |
| ySYC5-32 | ySYC5-24 | w303a nhp6a::nhp6a-iRFP(KAN) crz1::sfGFP-CandHIS ura::pADH1-zdk-CRZ1(WT)-mCherry-yeLANS;pTDH3-Hs_RGS2(33-67)_13aa-iRFP713 (iRFP)-asLOV2(404-546)(URA) leu::pPun1-Venus(LEU)                                                                               | promoter fusion driven by Crz1-CLASP; pPun1             | Supp Figure 4D                 | pSYC331        |
| ySYC5-30 | ySYC5-13 | w303a nhp6a::nhp6a-iRFP(KAN) crz1::sfGFP-CandHIS ura::pADH1-CRZ1(ALA)-mCherry(URA) leu::pPun1-Venus(LEU)                                                                                                                                                  | untrapped Crz1*; pPun1; flow; mseq                      | Supp Figure 4C, F              | pSYC331        |
| ySYC5-71 | ySYC5-69 | w303a nhp6a::nhp6a-iRFP(KAN) crz1::sfGFP-CandHIS ura::pADH1-zdk-CRZ1(5A)-mCherry-yeLANS;pTDH3-Hs_RGS2(33-67)_13aa-iRFP713 (iRFP)-asLOV2(404-546)(URA) leu::pPun1-Venus(LEU)                                                                               | crz1(5A); testing equivalence of crz1* and crz1(5A)     | Supp Figure 11                 | pSYC331        |
| ySYC6-23 | ySYC6-7  | w303a nhp6a::nhp6a-iRFP(KAN) crz1::sfGFP-CandHIS ura::pTef1-zdk-CRZ1(ALA)-mCherry-yeLANS; pTDH3-Hs_RGS2(33-67)_13aa-iRFP713 (iRFP)-asLOV2(404-546)(URA) leu::pGyp7-venus(LEU)                                                                             | pGYP7-YFP dose response strains (high expression level) | Figure 6C-D, Supp Figure 6     | pSYC392        |
| ySYC6-24 | ySYC6-6  | w303a nhp6a::nhp6a-iRFP(KAN) crz1::sfGFP-CandHIS ura::pRpl18b-zdk-CRZ1(ALA)-mCherry-yeLANS; pTDH3-Hs_RGS2(33-67)_13aa-iRFP713 (iRFP)-asLOV2(404-546)(URA) leu::pGyp7-venus(LEU)                                                                           | pGYP7-YFP dose response strains (low expression level)  | Figure 6C, Supp Figure 6       | pSYC392        |
| ySYC6-11 | ySYC4-34 | w303a nhp6a::nhp6a-iRFP(KAN) crz1::sfGFP-CandHIS leu::pGyp7-venus(LEU) P2                                                                                                                                                                                 | pGYP7-YFP dose response strains (Crz1 KO)               | Figure 6C, Supp Figure 6       | pSYC392        |
| ySYC6-18 | ySYC6-7  | w303a nhp6a::nhp6a-iRFP(KAN) crz1::sfGFP-CandHIS ura::pTef1-zdk-CRZ1(ALA)-mCherry-yeLANS; pTDH3-Hs_RGS2(33-67)_13aa-iRFP713 (iRFP)-asLOV2(404-546)(URA) leu::pYps1-venus(LEU)                                                                             | pYPS1-YFP dose response strains (high expression level) | Figure 4I                      | pSYC332        |

Table S2

|          |          |                                                                                                                                                                                         |                                                                      |                                       |         |
|----------|----------|-----------------------------------------------------------------------------------------------------------------------------------------------------------------------------------------|----------------------------------------------------------------------|---------------------------------------|---------|
| ySYC6-19 | ySYC6-6  | w303a nhp6a::nhp6a-iRFP(KAN) crz1::sfGFP-CandHIS ura::pRpl18b-zdk-CRZ(ALA)-mCherry-yeLANS; pTDH3-Hs_RGS2(33-67)_13aa-iRFP713 (iRFP)-asLOV2(404-546)(URA) leu::pYps1-venus(LEU)          | pYPS1-YFP dose response strains (low expression level)               | Figure 4I                             | pSYC332 |
| ySYC6-4  | ySYC4-34 | w303a nhp6a::nhp6a-iRFP(KAN) crz1::sfGFP-CandHIS leu::pYps1-venus(LEU)                                                                                                                  | pYPS1-YFP dose response strains (Crz1 KO)                            | Figure 4I                             | pSYC332 |
| ySYC6-28 | ySYC6-7  | w303a nhp6a::nhp6a-iRFP(KAN) crz1::sfGFP-CandHIS ura::pTef1-zdk-CRZ(ALA)-mCherry-yeLANS; pTDH3-Hs_RGS2(33-67)_13aa-iRFP713 (iRFP)-asLOV2(404-546) (URA) leu::pCmk2-venus(LEU)           | pCMK2-YFP dose response strains (high expression level)              | Figure 4J                             | pSYC395 |
| ySYC6-29 | ySYC6-6  | w303a nhp6a::nhp6a-iRFP(KAN) crz1::sfGFP-CandHIS ura::pRpl18b-zdk-CRZ(ALA)-mCherry-yeLANS(URA); pTDH3-Hs_RGS2(33-67)_13aa-iRFP713 (iRFP)-asLOV2(404-546)leu::pCmk2-venus(LEU)           | pCMK2-YFP dose response strains (Crz1 KO)                            | Figure 4J                             | pSYC395 |
| ySYC5-80 | ySYC4-34 | w303a nhp6a::nhp6a-iRFP(KAN) crz1::sfGFP-CandHIS leu::pCmk2-venus(LEU)                                                                                                                  | pCMK2-YFP dose response strains (low expression level)               | Figure 4J                             | pSYC395 |
| ySYC5-12 | ySYC4-34 | w303a nhp6a::nhp6a-iRFP(KAN) crz1::sfGFP-CandHIS ura::pADH1-CRZ(WT)-mCherry-yeLANS(URA)                                                                                                 | Crz1 KO, Crz1-yeLANS; used for RNAseq                                | Supp Figure 4C                        |         |
| ySYC6-33 | ySYC5-36 | w303a nhp6a::nhp6a-iRFP(KAN) crz1::sfGFP-CandHIS ura::pADH1-zdk-CRZ1(ALA)-mCherry-yeLANS;pTDH3-Hs_RGS2(33-67)_13aa-iRFP713 (iRFP)-asLOV2(404-546)(URA) leu::pYps1-Venus(LEU) pYPS1::TRP | Crz1*-CLASP, pYPS1-YFP promoter fusion, pYPS1 KO; used for ChIP-qPCR | Figure 6H                             |         |
| ySYC6-34 | ySYC5-37 | w303a nhp6a::nhp6a-iRFP(KAN) crz1::sfGFP-CandHIS ura::pADH1-zdk-CRZ1(ALA)-mCherry-yeLANS;pTDH3-Hs_RGS2(33-67)_13aa-iRFP713 (iRFP)-asLOV2(404-546)(URA) leu::pGyp7-Venus(LEU) pGYP7::TRP | Crz1*-CLASP, pGYP7-YFP promoter fusion, pGYP7 KO; used for ChIP-qPCR | Figure 6H                             |         |
| ySYC6-3  | ySYC4-34 | w303a nhp6a::nhp6a-iRFP(KAN) crz1::sfGFP-CandHIS leu::pPun1-venus(LEU)                                                                                                                  | Pun1 promoter fusion, CrzKO                                          | background strain                     | pSYC331 |
| yBMH34   |          | w303a Nhp6a-iRFP(Kan)                                                                                                                                                                   |                                                                      | background strain                     |         |
| yBMH35   |          | w303a TPK1/2/3-AS Nhp6a-iRFP (Kan)                                                                                                                                                      |                                                                      | background strain                     |         |
| ySYC4-34 | yBMH34   | W303a Nhp6a-iRFP(Kan) crz1::HIS(candida)                                                                                                                                                |                                                                      | background strain                     |         |
| ySYC5-11 | ySYC4-34 | w303a nhp6a::nhp6a-iRFP(KAN) crz1::sfGFP-CandHIS ura::pADH1-CRZ(WT)-mCherry(URA)                                                                                                        |                                                                      | Supp Figure 4A, 4C; background strain | pSYC295 |
| ySYC5-13 | ySYC4-34 | w303a nhp6a::nhp6a-iRFP(KAN) crz1::sfGFP-CandHIS ura::pADH1-CRZ1(ALA)-mCherry(URA)                                                                                                      |                                                                      | background strain                     | pSYC293 |
| ySYC5-24 | ySYC4-34 | w303a nhp6a::nhp6a-iRFP(KAN) crz1::sfGFP-CandHIS ura::pADH1-zdk-CRZ1(WT)-mCherry-yeLANS;pTDH3-Hs_RGS2(33-67)_13aa-iRFP713 (iRFP)-asLOV2(404-546)(URA)                                   |                                                                      | background strain                     | pSYC310 |
| ySYC5-26 | ySYC4-34 | w303a nhp6a::nhp6a-iRFP(KAN) crz1::sfGFP-CandHIS ura::pADH1-zdk-CRZ1(ALA)-mCherry-yeLANS;pTDH3-Hs_RGS2(33-67)_13aa-iRFP713 (iRFP)-asLOV2(404-546)(URA)                                  |                                                                      | background strain                     | pSYC308 |
| ySYC5-69 | ySYC4-34 | w303a nhp6a::nhp6a-iRFP(KAN) crz1::sfGFP-CandHIS ura::pADH1-zdk-CRZ1(5A)-mCherry-yeLANS;pTDH3-Hs_RGS2(33-67)_13aa-iRFP713 (iRFP)-asLOV2(404-546)(URA)                                   | precursor strain for Crz1(5A); pPun1                                 | background strain                     | pSYC346 |
| ySYC6-6  | ySYC4-34 | w303a nhp6a::nhp6a-iRFP(KAN) crz1::sfGFP-CandHIS ura::pRpl18b-zdk-CRZ(ALA)-mCherry-yeLANS; pTDH3-Hs_RGS2(33-67)_13aa-iRFP713 (iRFP)-asLOV2(404-546) (URA)                               |                                                                      | background strain                     | pSYC411 |
| ySYC6-7  | ySYC4-34 | w303a nhp6a::nhp6a-iRFP(KAN) crz1::sfGFP-CandHIS ura::pTef1-zdk-CRZ(ALA)-mCherry-yeLANS; pTDH3-Hs_RGS2(33-67)_13aa-iRFP713 (iRFP)-asLOV2(404-546)(URA)                                  |                                                                      | background strain                     | pSYC410 |

Table S3

| Name   | Background (non-GG) | Marker | Description                                                                                                                                                                                       | Notes                                                                                                                                                                | Addgene ID |
|--------|---------------------|--------|---------------------------------------------------------------------------------------------------------------------------------------------------------------------------------------------------|----------------------------------------------------------------------------------------------------------------------------------------------------------------------|------------|
| pLO405 |                     | URA3   | URA3 5' Homology-ConS-pRPL18B-Zdk1-mScarlet-yeLANS-tADH1-Con1-pRPL18B-Hs_RGS2(33-67)_13aa-iRFP713 (iRFP)-asLOV2(404-546)-tPGK1-ConE-URA3 (pSc-native-tSc)-URA3 3' Homology-KanR-ColE1             | mScarlet-CLASP strain used in Figure 1 and Supplementary Figures; medium expression of mScarlet and pm-LOVTRAP                                                       | 133086     |
| pLO278 |                     | URA3   | URA3 5' Homology-ConS-pRPL18B-Zdk1-VP16-ZF43_8-mScarlet-yeLANS-tADH1-Con1-pRPL18B-Hs_RGS2(33-67)_13aa-iRFP713 (iRFP)-asLOV2(404-546)-tPGK1-ConE-URA3 (pSc-native-tSc)-URA3 3' Homology-KanR-ColE1 | SynTF-CLASP strain used in Figure 2 and Supplementary Figures; medium expression of SynTF and high expression of pm-LOVTRAP                                          |            |
| pLO388 |                     | LEU2   | LEU2 5' Homology-ConLS'-pPHO84-Venus-tPGK1-ConRE'-LEU2 (pSc-native-tSc)-LEU2 3' Homology-KanR-ColE1                                                                                               | pPHO84 reporter                                                                                                                                                      |            |
| pLO361 |                     | URA3   | URA3 5' Homology-ConS-pRPL18B-Zdk1-Msn2-mScarlet-yeLANS-tADH1-Con1-pTDH3-Hs_RGS2(33-67)_13aa-iRFP713 (iRFP)-asLOV2(404-546)-tPGK1-ConE'-URA3 (pSc-native-tSc)-URA3 3' Homology-KanR-ColE1         | Msn2-CLASP plasmid for strain used in Figure 2 and Supplementary Figures; medium expression of Msn2 and high expression of pm-LOVTRAP                                |            |
| pLO485 |                     | URA3   | URA3 5' Homology-ConLS'-pTDH3-TOM20_TMD(1-39)-iRFP713 (iRFP)-asLOV2(404-546)-tPGK1-ConRE'-URA3 (pSc-native-tSc)-URA3 3' Homology-KanR-ColE1                                                       | High expression Mito-LOVTRAP                                                                                                                                         |            |
| pLO486 |                     | URA3   | URA3 5' Homology-ConLS'-pRPL18B-TOM20_TMD(1-39)-iRFP713 (iRFP)-asLOV2(404-546)-tPGK1-ConRE'-URA3 (pSc-native-tSc)-URA3 3' Homology-KanR-ColE1                                                     | Medium expression Mito-LOVTRAP                                                                                                                                       |            |
| pLO487 |                     | URA3   | URA3 5' Homology-ConLS'-pREV1-TOM20_TMD(1-39)-iRFP713 (iRFP)-asLOV2(404-546)-tPGK1-ConRE'-URA3 (pSc-native-tSc)-URA3 3' Homology-KanR-ColE1                                                       | Low expression Mito-LOVTRAP                                                                                                                                          |            |
| pLO488 |                     | URA3   | URA3 5' Homology-ConLS'-pTDH3-Hs_RGS2(33-67)_13aa-iRFP713 (iRFP)-asLOV2(404-546)-tPGK1-ConRE'-URA3 (pSc-native-tSc)-URA3 3' Homology-KanR-ColE1                                                   | High expression PM-LOVTRAP                                                                                                                                           |            |
| pLO489 |                     | URA3   | URA3 5' Homology-ConLS'-pRPL18B-Hs_RGS2(33-67)_13aa-iRFP713 (iRFP)-asLOV2(404-546)-tPGK1-ConRE'-URA3 (pSc-native-tSc)-URA3 3' Homology-KanR-ColE1                                                 | Medium expression PM-LOVTRAP                                                                                                                                         |            |
| pLO490 |                     | URA3   | URA3 5' Homology-ConLS'-pREV1-Hs_RGS2(33-67)_13aa-iRFP713 (iRFP)-asLOV2(404-546)-tPGK1-ConRE'-URA3 (pSc-native-tSc)-URA3 3' Homology-KanR-ColE1                                                   | Low expression PM-LOVTRAP                                                                                                                                            |            |
| pLO402 |                     | URA3   | URA3 5' Homology-ConS-pTDH3-Zdk1-mScarlet-yeLANS-tADH1-Con1-pTDH3-Hs_RGS2(33-67)_13aa-iRFP713 (iRFP)-asLOV2(404-546)-tPGK1-ConE-URA3 (pSc-native-tSc)-URA3 3' Homology-KanR-ColE1                 | mScarlet-CLASP plasmid for strain used in Supplementary Figures; high expression of mScarlet and PM-LOVTRAP                                                          |            |
| pLO407 |                     | URA3   | URA3 5' Homology-ConS-pREV1-Zdk1-mScarlet-yeLANS-tADH1-Con1-pREV1-Hs_RGS2(33-67)_13aa-iRFP713 (iRFP)-asLOV2(404-546)-tPGK1-ConE-URA3 (pSc-native-tSc)-URA3 3' Homology-KanR-ColE1                 | mScarlet-CLASP plasmid for strain used in Supplementary Figures; low expression of mScarlet and PM-LOVTRAP                                                           |            |
| pLO414 |                     | URA3   | URA3 5' Homology-ConS-pTDH3-Zdk1-mScarlet-yeLANS-tADH1-Con1-pTDH3-TOM20_TMD(1-39)-iRFP713 (iRFP)-asLOV2(404-546)-tPGK1-ConE-URA3 (pSc-native-tSc)-URA3 3' Homology-KanR-ColE1                     | Zdk1-mScarlet-yeLANS + mito-LOVTRAP plasmid for strain used in Supplementary Figures; high expression of mScarlet and mito-LOVTRAP                                   |            |
| pLO417 |                     | URA3   | URA3 5' Homology-ConS-pRPL18B-Zdk1-mScarlet-yeLANS-tADH1-Con1-pRPL18B-TOM20_TMD(1-39)-iRFP713 (iRFP)-asLOV2(404-546)-tPGK1-ConE-URA3 (pSc-native-tSc)-URA3 3' Homology-KanR-ColE1                 | Zdk1-mScarlet-yeLANS + mito-LOVTRAP plasmid for strain used in Supplementary Figures; medium expression of mScarlet and mito-LOVTRAP                                 |            |
| pLO419 |                     | URA3   | URA3 5' Homology-ConS-pREV1-Zdk1-mScarlet-yeLANS-tADH1-Con1-pREV1-TOM20_TMD(1-39)-iRFP713 (iRFP)-asLOV2(404-546)-tPGK1-ConE-URA3 (pSc-native-tSc)-URA3 3' Homology-KanR-ColE1                     | Zdk1-mScarlet-yeLANS + mito-LOVTRAP plasmid for strain used in Supplementary Figures; low expression of mScarlet and mito-LOVTRAP                                    |            |
| pLO316 |                     | URA3   | URA3 5' Homology-ConS-pRPL18B-VP16-ZF43_8-mScarlet-yeLANS-tADH1-Con1-pRPL18B-Hs_RGS2(33-67)_13aa-iRFP713 (iRFP)-asLOV2(404-546)-tPGK1-ConE-URA3 (pSc-native-tSc)-URA3 3' Homology-KanR-ColE1      | SynTF-yeLANS plasmid for strain used in Supplementary Figures; medium expression of SynTF and PM-LOVTRAP (expressed as control for CLASP strains)                    |            |
| pLO366 |                     | URA3   | URA3 5' Homology-ConS-pRPL18B-Msn2-mScarlet-yeLANS-tADH1-Con1-pTDH3-Hs_RGS2(33-67)_13aa-iRFP713 (iRFP)-asLOV2(404-546)-tPGK1-ConE'-URA3 (pSc-native-tSc)-URA3 3' Homology-KanR-ColE1              | Msn2-yeLANS plasmid for strain used in Supplementary Figures; medium expression of Msn2 and high expression of PM-LOVTRAP (expressed as control for CLASP strains)   |            |
| pLO344 |                     | URA3   | URA3 5' Homology-ConS-pRPL18B-VP16-ZF43_8-mScarlet-NLS11-tADH1-Con1-pRPL18B-Hs_RGS2(33-67)_13aa-iRFP713 (iRFP)-asLOV2(404-546)-tPGK1-ConE-URA3 (pSc-native-tSc)-URA3 3' Homology-KanR-ColE1       | SynTF-NLS plasmid for strain used in Supplementary Figures; medium expression of SynTF and PM-LOVTRAP (expressed as control for CLASP strains)                       |            |
| pLO411 |                     | URA3   | URA3 5' Homology-ConS-pRPL18B-VP16-ZF43_8-mScarlet-tADH1-Con1-pRPL18B-Hs_RGS2(33-67)_13aa-iRFP713 (iRFP)-asLOV2(404-546)-tPGK1-ConE-URA3 (pSc-native-tSc)-URA3 3' Homology-KanR-ColE1             | SynTF-mScarlet plasmid for strain used in Supplementary Figures; medium expression of SynTF and PM-LOVTRAP (expressed as control for CLASP strains)                  |            |
| pLO412 |                     | URA3   | URA3 5' Homology-ConS-pRPL18B-Pho4-mScarlet-tADH1-Con1-pTDH3-Hs_RGS2(33-67)_13aa-iRFP713 (iRFP)-asLOV2(404-546)-tPGK1-ConE-URA3 (pSc-native-tSc)-URA3 3' Homology-KanR-ColE1                      | Pho4-mScarlet plasmid for strain used in Supplementary Figures; medium expression of Pho4 and high expression of PM-LOVTRAP (expressed as control for CLASP strains) |            |
| pLO465 |                     | URA3   | URA3 5' Homology-ConS-pRPL18B-Pho4-mScarlet-NLS11-tADH1-Con1-pTDH3-Hs_RGS2(33-67)_13aa-iRFP713 (iRFP)-asLOV2(404-546)-tPGK1-ConE-URA3 (pSc-native-tSc)-URA3 3' Homology-KanR-ColE1                | Pho4-NLS plasmid for strain used in Supplementary Figures; medium expression of Pho4 and high expression of PM-LOVTRAP (expressed as control for CLASP strains)      |            |
| pLO463 |                     | URA3   | URA3 5' Homology-ConS-pRPL18B-Msn2-mScarlet-NLS11-tADH1-Con1-pTDH3-Hs_RGS2(33-67)_13aa-iRFP713 (iRFP)-asLOV2(404-546)-tPGK1-ConE'-URA3 (pSc-native-tSc)-URA3 3' Homology-KanR-ColE1               | Msn2-NLS plasmid for strain used in Supplementary Figures; medium expression of Msn2 and high expression of PM-LOVTRAP (expressed as control for CLASP strains)      |            |
| pLO480 |                     | URA3   | URA3 5' Homology-ConS-pRPL18B-Msn2-mScarlet-tADH1-Con1-pTDH3-Hs_RGS2(33-67)_13aa-iRFP713 (iRFP)-asLOV2(404-546)-tPGK1-ConE'-URA3 (pSc-native-tSc)-URA3 3' Homology-KanR-ColE1                     | Msn2-mScarlet plasmid for strain used in Supplementary Figures; medium expression of Msn2 and high expression of PM-LOVTRAP (expressed as control for CLASP strains) |            |
| pLO364 |                     | URA3   | URA3 5' Homology-ConS-pRPL18B-Zdk1-Gal4-mScarlet-yeLANS-tADH1-Con1-pTDH3-Hs_RGS2(33-67)_13aa-iRFP713 (iRFP)-asLOV2(404-546)-tPGK1-ConE-URA3 (pSc-native-tSc)-URA3 3' Homology-KanR-ColE1          | Gal4-CLASP plasmid for strain used in Supplementary Figures; medium expression of Gal4 and high expression of PM-LOVTRAP                                             |            |
| pLO413 |                     | URA3   | URA3 5' Homology-ConS-pRPL18B-Zdk1-Gal4-mScarlet-tADH1-Con1-pTDH3-Hs_RGS2(33-67)_13aa-iRFP713 (iRFP)-asLOV2(404-546)-tPGK1-ConE-URA3 (pSc-native-tSc)-URA3 3' Homology-KanR-ColE1                 | Gal4-mScarlet plasmid for strain used in Supplementary Figures; medium expression of Gal4 and high expression of PM-LOVTRAP (expressed as control for CLASP strain)  |            |
| pAN736 |                     | LEU2   | LEU2 5' Homology-p43_8(8x)-Venus-tPGK1-LEU2 (pSc-native-tSc)-LEU2 3' Homology-KanR-ColE1                                                                                                          | pSynTF reporter                                                                                                                                                      |            |

Table S3

|         |         |      |                                                                                                                                                                                          |                                                                                                                                       |        |
|---------|---------|------|------------------------------------------------------------------------------------------------------------------------------------------------------------------------------------------|---------------------------------------------------------------------------------------------------------------------------------------|--------|
| pLO363  |         | URA3 | URA3 5' Homology-ConS-pRPL18B-Zdk1-Pho4-mScarlet-yeLANS-tADH1-Con1-pTDH3-Hs_RGS2(33-67)_13aa-iRFP713 (iRFP)-asLOV2(404-546)-tPGK1-ConE-URA3 (pSc-native-tSc)-URA3 3' Homology-KanR-ColE1 | Pho4-CLASP plasmid for strain used in Figure 2 and Supplementary Figures; medium expression of Pho4 and high expression of PM-LOVTRAP |        |
| pLO352  |         | LEU2 | LEU2 5' Homology-ConS-pHsp12-Venus-tPGK1-ConE-LEU2 (pSc-native-tSc)-LEU2 3' Homology-KanR-ColE1                                                                                          | pHSP12 reporter                                                                                                                       |        |
| YTK120  |         | HIS3 | C.G. HIS3                                                                                                                                                                                | HIS3 cassette                                                                                                                         |        |
| pAN160  |         | LEU2 | LEU2 5' Homology-ConS-pGal1-Venus-tPGK1-ConE-LEU2 (pSc-native-tSc)-LEU2 3' Homology-KanR-ColE1                                                                                           | pGAL1 reporter                                                                                                                        |        |
| pSYC084 | pSYC081 | TRP1 | pAdh1-mCherry-PEF-NESLOVNLS-JSO179                                                                                                                                                       | original LANS Yumerefendi 2015                                                                                                        |        |
| pSYC085 | pSYC084 | TRP1 | pAdh1-mCherry-PEF-NESLOVNLSvar#3-JSO179                                                                                                                                                  | NLS variant                                                                                                                           |        |
| pSYC086 | pSYC084 | TRP1 | pAdh1-mCherry-PEF-NESLOVNLSvar#4-JSO179                                                                                                                                                  | NLS variant                                                                                                                           |        |
| pSYC087 | pSYC084 | TRP1 | pAdh1-mCherry-PEF-NESLOVNLSvar#5-JSO179                                                                                                                                                  | NLS variant                                                                                                                           |        |
| pSYC088 | pSYC084 | TRP1 | pAdh1-mCherry-PEF-NESLOVNLSvar#8-JSO179                                                                                                                                                  | NLS variant                                                                                                                           |        |
| pSYC089 | pSYC084 | TRP1 | pAdh1-mCherry-PEF-NESLOVNLSvar#9-JSO179                                                                                                                                                  | NLS variant                                                                                                                           |        |
| pSYC090 | pSYC084 | TRP1 | pAdh1-mCherry-PEF-NESLOVNLSvar#11-JSO179                                                                                                                                                 | NLS variant (yeLANS)                                                                                                                  |        |
| pSYC091 | pSYC084 | TRP1 | pAdh1-mCherry-PEF-NESLOVNLSvar#14-JSO179                                                                                                                                                 | NLS variant                                                                                                                           |        |
| pSYC092 | pSYC084 | TRP1 | pAdh1-mCherry-PEF-NESLOVNLSvar#15-JSO179                                                                                                                                                 | NLS variant                                                                                                                           |        |
| pSYC093 | pSYC084 | TRP1 | pAdh1-mCherry-PEF-NESLOVNLSvar#20-JSO179                                                                                                                                                 | NLS variant                                                                                                                           |        |
| pSYC094 | pSYC084 | TRP1 | pAdh1-mCherry-PEF-NESLOVNLSvar#24-JSO179                                                                                                                                                 | NLS variant                                                                                                                           |        |
| pSYC095 | pSYC084 | TRP1 | pAdh1-mCherry-PEF-NESLOVNLSvar#27-JSO179                                                                                                                                                 | NLS variant                                                                                                                           |        |
| pSYC096 | pSYC084 | TRP1 | pAdh1-mCherry-PEF-NESLOVNLSvar#29-JSO179                                                                                                                                                 | NLS variant                                                                                                                           |        |
| pJSO081 | pJSO179 | TRP1 | PEF_NESLOVNLS_SacI-JSO179                                                                                                                                                                | intermediate plasmid                                                                                                                  |        |
| pJSO179 | pNH604  | TRP1 | p604; basic single integration vector from Lim lab                                                                                                                                       | base plasmid                                                                                                                          |        |
| pJSO529 | pNH604  | TRP1 | 604-Adh1-Dot6-mCherry                                                                                                                                                                    | tagged TF to test for localization dynamics in response to environmental inputs                                                       |        |
| pJSO568 | pNH604  | TRP1 | 604-pAdh1-Crz1-mcherry                                                                                                                                                                   | tagged TF to test for localization dynamics in response to environmental inputs                                                       |        |
| pJSO269 | pNH604  | TRP1 | 604-pAdh1-Stb3-mCherry                                                                                                                                                                   | tagged TF to test for localization dynamics in response to environmental inputs                                                       |        |
| pJSO392 | pNH604  | TRP1 | 604-pAdh1-MSN2-mCherry                                                                                                                                                                   | tagged TF to test for localization dynamics in response to environmental inputs                                                       |        |
| pJSO285 | pNH604  | TRP1 | 604-pAdh1-Msn4-mCherry                                                                                                                                                                   | tagged TF to test for localization dynamics in response to environmental inputs                                                       |        |
| pJSO569 | pNH604  | TRP1 | 604-pAdh1-Pho4-mcherry                                                                                                                                                                   | tagged TF to test for localization dynamics in response to environmental inputs                                                       |        |
| pSYC332 |         | LEU2 | pYPS1-Venus                                                                                                                                                                              | promoter fusion                                                                                                                       | 133118 |
| pSYC392 |         | LEU2 | pGYP7-Venus                                                                                                                                                                              | promoter fusion                                                                                                                       | 133120 |
| pSYC393 |         | LEU2 | pPUT1-Venus                                                                                                                                                                              | promoter fusion                                                                                                                       |        |
| pSYC395 |         | LEU2 | pCMK2-Venus                                                                                                                                                                              | promoter fusion                                                                                                                       | 133119 |
| pSYC398 |         | LEU2 | pENA1-Venus                                                                                                                                                                              | promoter fusion                                                                                                                       |        |
| pSYC400 |         | LEU2 | pMEP1-Venus                                                                                                                                                                              | promoter fusion                                                                                                                       |        |
| pSYC331 |         | LEU2 | pPUN1-Venus                                                                                                                                                                              | promoter fusion                                                                                                                       |        |
| pSYC295 |         | URA3 | pADH1-Crz1-mcherry-tPGK1                                                                                                                                                                 | Crz1 WT characterization                                                                                                              |        |
| pSYC293 |         | URA3 | pADH1-Crz1(19A)-mcherry-tPGK1                                                                                                                                                            | Crz1* characterization                                                                                                                |        |
| pSYC310 |         | URA3 | pADH1-zdk-Crz1-mcherry-yeLANS-tPGK1; pTDH3-Rgs2-iRFP713-asLOV2(404-546)-tPGK1                                                                                                            | Crz1 WT - CLASP characterization                                                                                                      |        |
| pSYC308 |         | URA3 | pADH1-zdk-Crz1(19A)-mcherry-yeLANS-tPGK1; pTDH3-Rgs2-iRFP713-asLOV2(404-546)-tPGK1                                                                                                       | Crz1*-CLASP characterization                                                                                                          | 133085 |
| pSYC346 |         | URA3 | pADH1-zdk-Crz1(5A)-mcherry-yeLANS; pTDH3-Rgs2-iRFP713-asLOV2(404-546)-tPGK1                                                                                                              | Crz1 5A - CLASP characterization                                                                                                      |        |
| pSYC410 |         | URA3 | pTEF1-zdk-Crz1(19A)-mcherry-yeLANS; pTDH3-Rgs2-iRFP713-asLOV2(404-546)-tPGK1                                                                                                             | Crz1*-CLASP dose response                                                                                                             |        |
| pSYC411 |         | URA3 | pRPL18b-zdk-Crz1(19A)-mcherry-yeLANS; pTDH3-Rgs2-iRFP713-asLOV2(404-546)-tPGK1                                                                                                           | Crz1*-CLASP dose response                                                                                                             |        |

Table S4

| Light Dose | milliWattage | Std Dev   | Date     |
|------------|--------------|-----------|----------|
| 0          | -0.0001499   | 0.0002004 | 20181205 |
| 0          | -0.0002513   | 0.000252  | 20181128 |
| 0          | -0.001819    | 0.000978  | 20181109 |
| 64         | 0.1011       | 0.008522  | 20181205 |
| 64         | 0.07921      | 0.007053  | 20181128 |
| 64         | 0.1279       | 0.01123   | 20181109 |
| 128        | 0.1944       | 0.02126   | 20181205 |
| 128        | 0.1962       | 0.01824   | 20181128 |
| 128        | 0.2633       | 0.02653   | 20181109 |
| 256        | 0.3961       | 0.0393    | 20181205 |
| 256        | 0.4012       | 0.0362    | 20181128 |
| 256        | 0.5107       | 0.04832   | 20181109 |
| 512        | 0.7849       | 0.07396   | 20181205 |
| 512        | 0.7776       | 0.09084   | 20181128 |
| 512        | 1.041        | 0.09508   | 20181109 |
| 1024       | 1.53         | 0.1346    | 20181205 |
| 1024       | 1.477        | 0.1491    | 20181128 |
| 1024       | 1.986        | 0.2349    | 20181109 |
| 2048       | 3.088        | 0.3326    | 20181205 |
| 2048       | 3.026        | 0.2563    | 20181128 |
| 2048       | 3.45         | 0.9       | 20181109 |
| 3072       | 4.302        | 0.4414    | 20181205 |
| 3072       | 4.235        | 0.4559    | 20181128 |
| 4095       | 5.407        | 0.5494    | 20181205 |
| 4095       | 5.486        | 0.4617    | 20181128 |
| 4095       | 6.56         | 0.587     | 20181109 |
